# Supplementary material for: Anion-dependent ion-pairing assemblies of triazatriangulenium cation that interferes with stacking structures
Source: publisher site journal article supplement (doi:10.3762/bjoc.20.215), 2024-10-10
Supplement: Additional file 1 [file 1860-5397-20-215-S1.pdf]

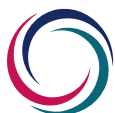

## Supporting Information

for

### **Anion-dependent ion-pairing assemblies of triazatriangulenium cation that interferes with stacking structures**

Yohei Haketa, Takuma Matsuda and Hiromitsu Maeda

*Beilstein J. Org. Chem.* **2024**, *20*, 2567–2576. [doi:10.3762/bjoc.20.215](https://doi.org/10.3762/bjoc.20.215)

### **$^1\text{H}$ , $^{13}\text{C}$ , and $^{19}\text{F}$ NMR spectra of new ion pairs, details for crystal structures, and theoretical calculations**

## Table of contents

|                                                                            |     |
|----------------------------------------------------------------------------|-----|
| <b>1. Spectroscopic data</b> .....                                         | S2  |
| <b>Figure S1–4</b> $^1\text{H}$ and $^{13}\text{C}$ NMR spectra .....      | S2  |
| <b>Figure S5</b> UV–vis absorption spectra .....                           | S9  |
| <b>2. X-ray crystallographic data</b> .....                                | S10 |
| <b>Figure S6–10</b> Ortep drawings .....                                   | S10 |
| <b>Figure S11–16</b> Packing diagrams .....                                | S14 |
| <b>Figure S17–21</b> Hirshfeld analysis .....                              | S17 |
| <b>3. Theoretical studies</b> .....                                        | S19 |
| <b>Figure S22</b> Optimized structure .....                                | S19 |
| <b>Figure S23</b> ESP mapping .....                                        | S19 |
| <b>Figure S24,25</b> Molecular orbitals and TD-DFT calculations .....      | S20 |
| <b>Figure S26–30</b> EDA analyses of single-crystal X-ray structures ..... | S22 |
| Cartesian coordination of optimized structures .....                       | S27 |

## 1. Spectroscopic data

Figure S1 (a)  $^1\text{H}$  NMR, (b)  $^{13}\text{C}$  NMR, and (c)  $^{19}\text{F}$  NMR spectra of  $2^+\text{-BF}_4^-$  in  $\text{CDCl}_3$ .

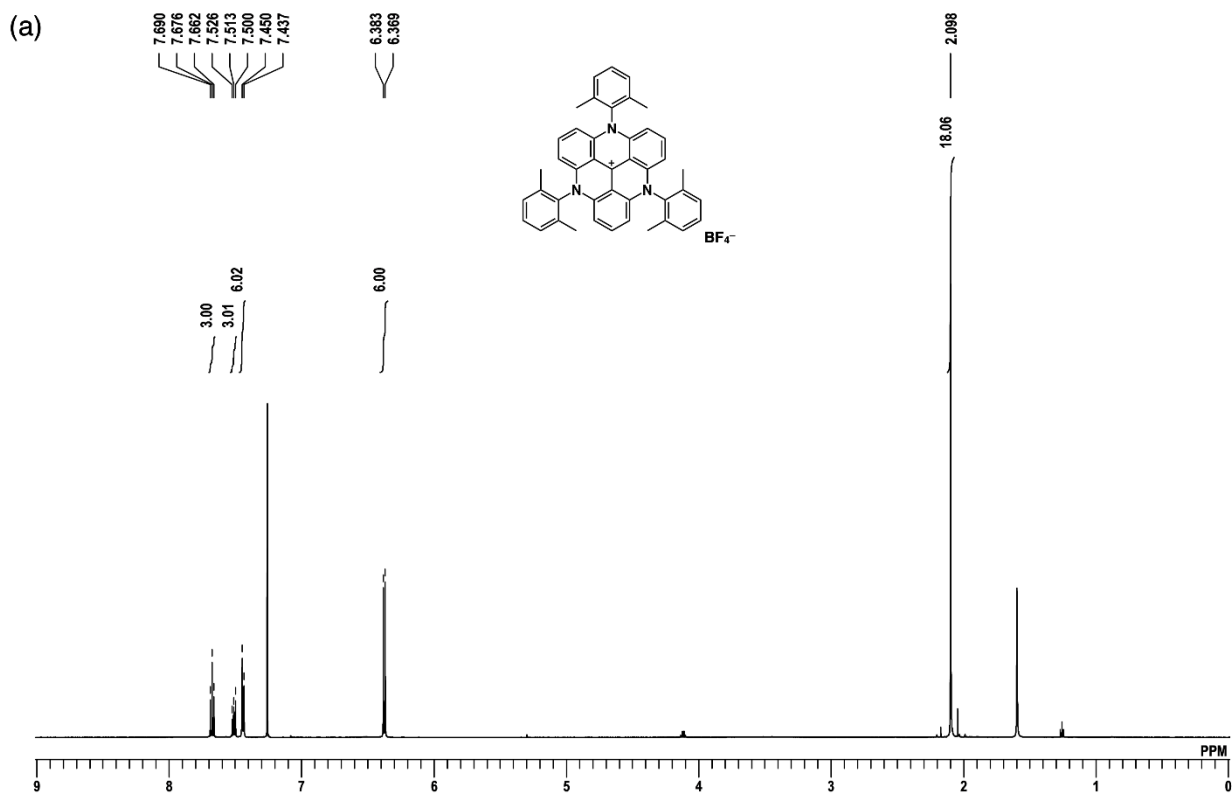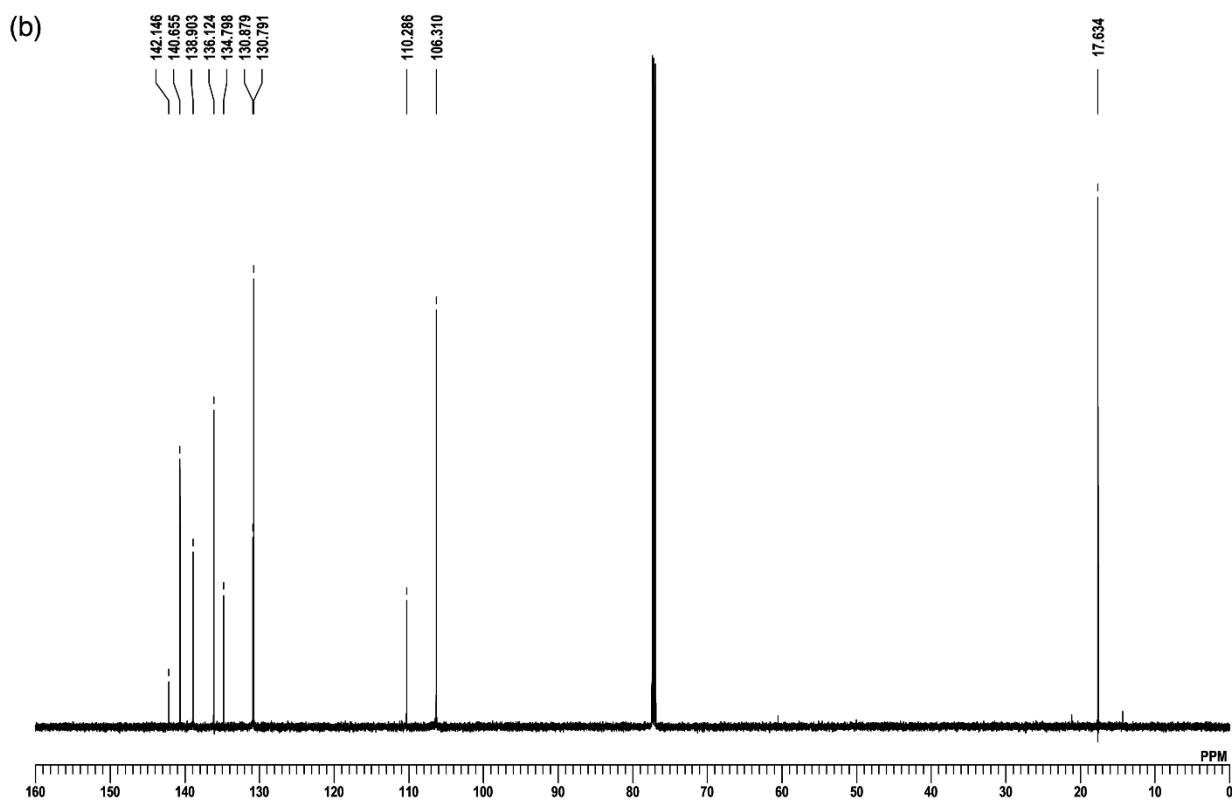

(c)

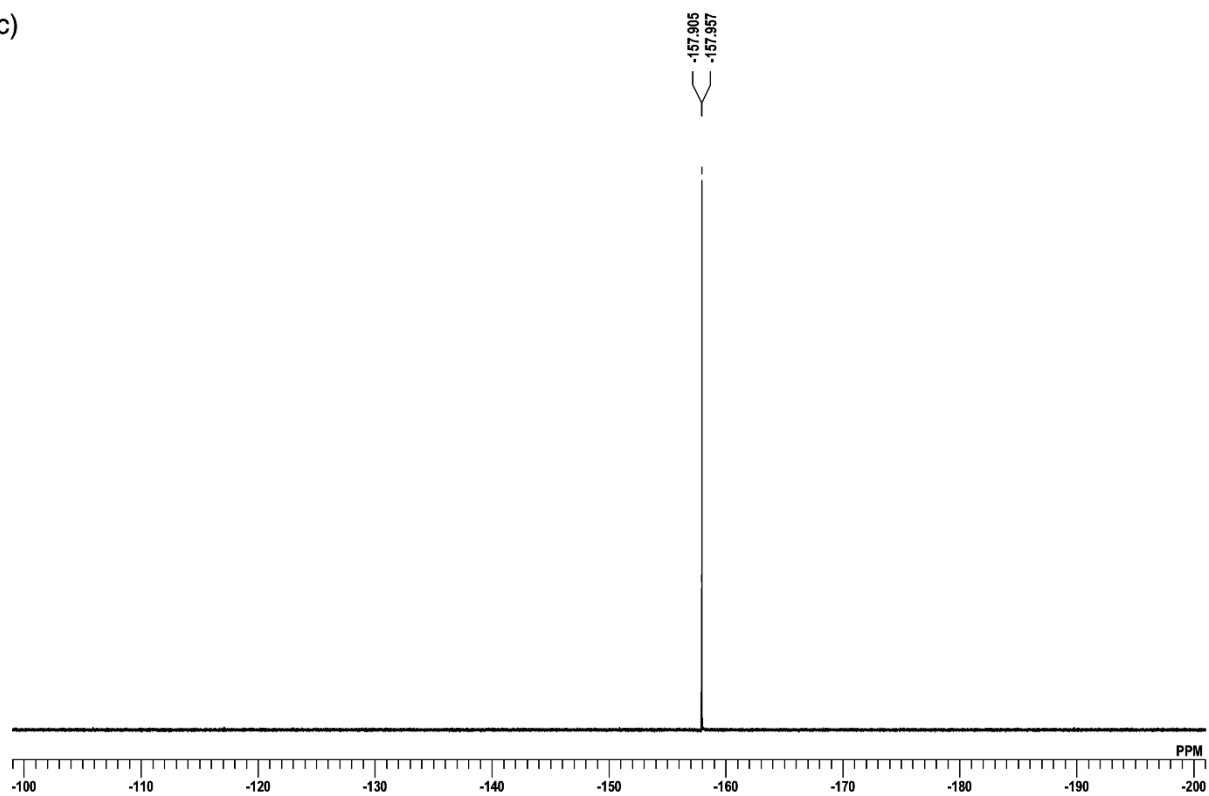

Figure S2 (a)  $^1\text{H}$  NMR, (b)  $^{13}\text{C}$  NMR, and (c)  $^{19}\text{F}$  NMR spectra of  $2^+\text{-PF}_6^-$  in  $\text{CDCl}_3$ .

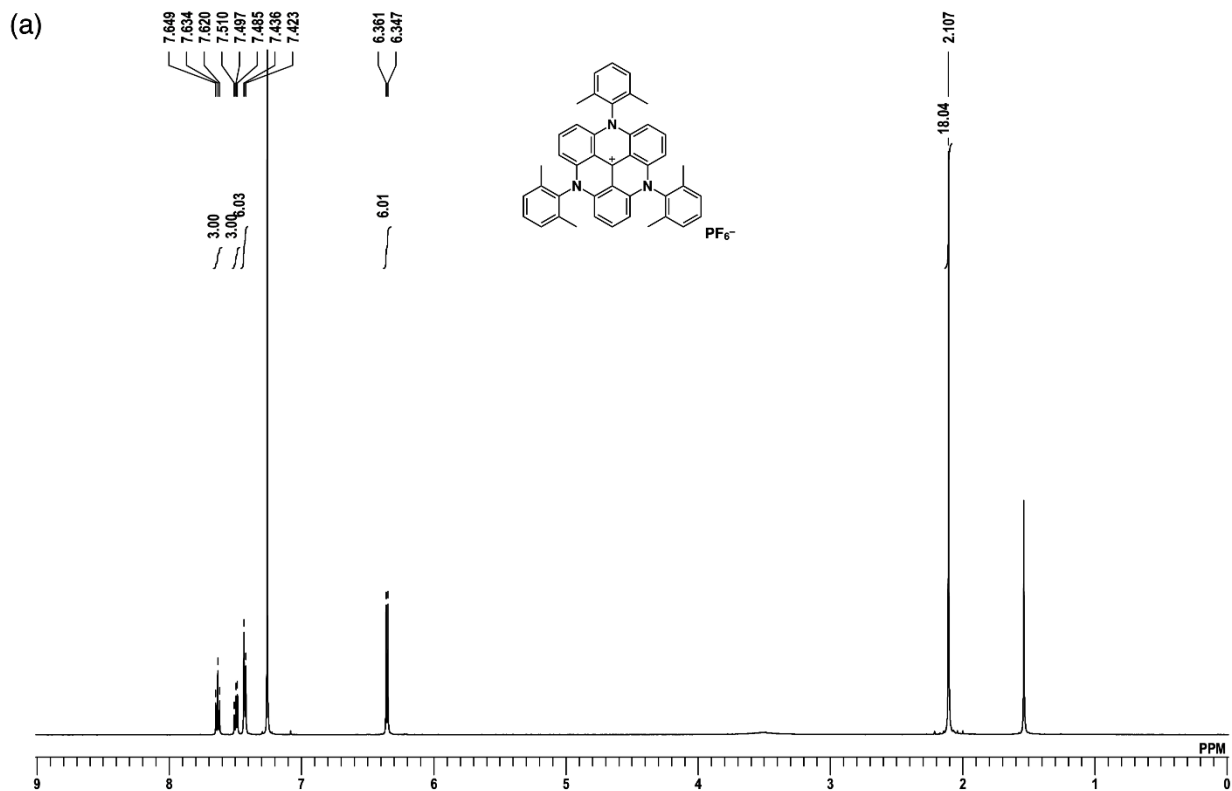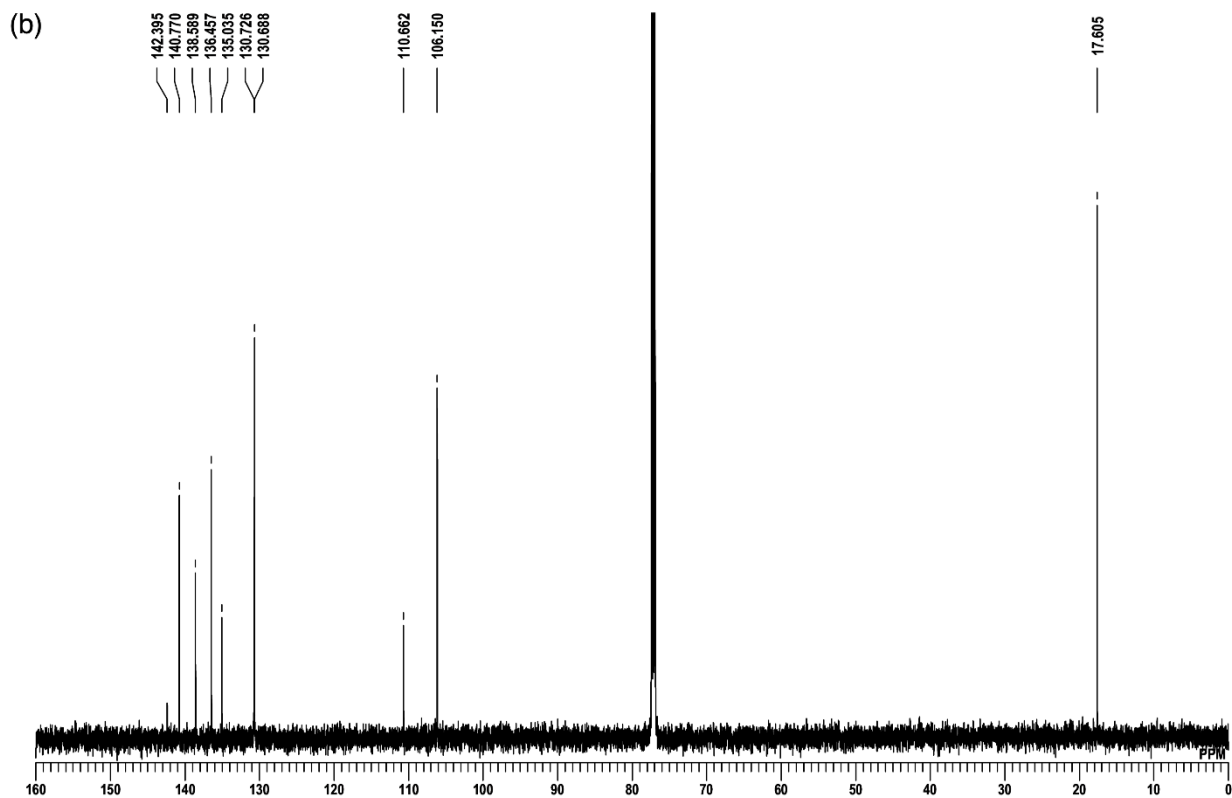

(c)

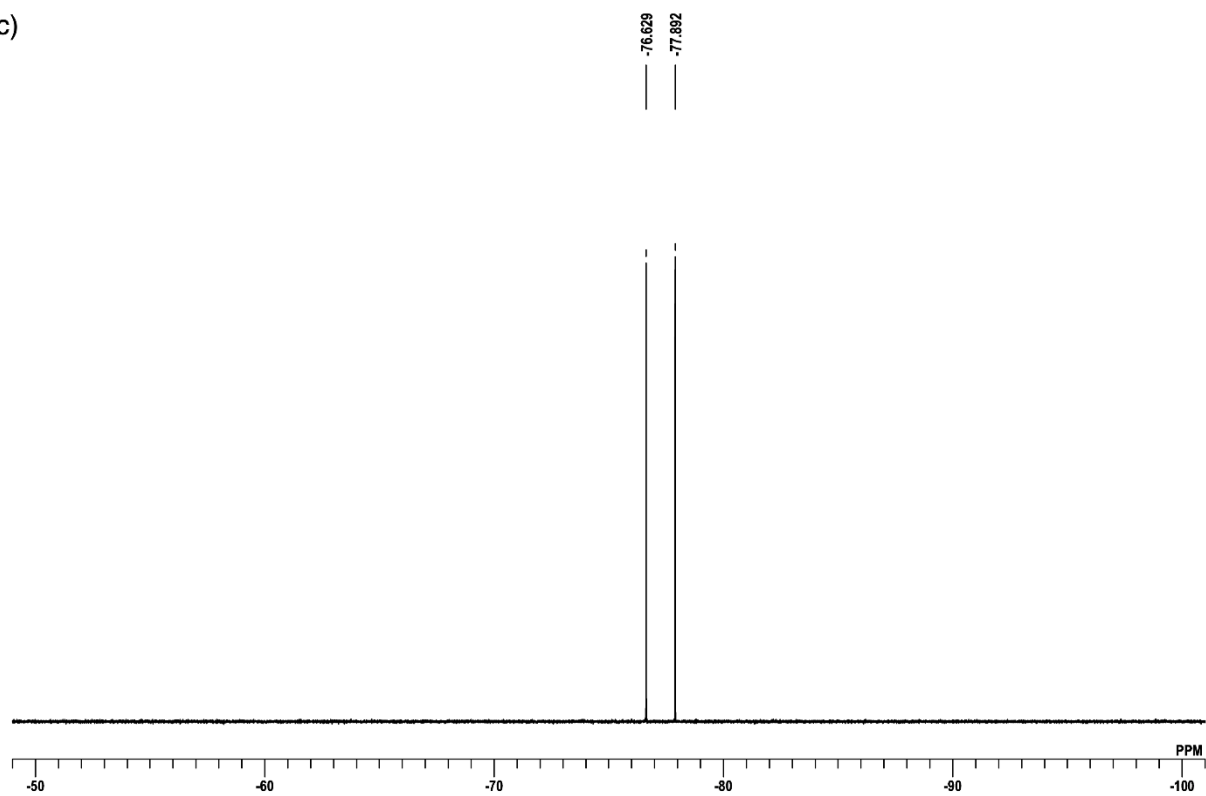

**Figure S3** (a)  $^1\text{H}$  NMR, (b)  $^{13}\text{C}$  NMR, and (c)  $^{19}\text{F}$  NMR spectra of  $2^+-\text{B}(\text{C}_6\text{F}_5)_4^-$  in  $\text{CDCl}_3$ .

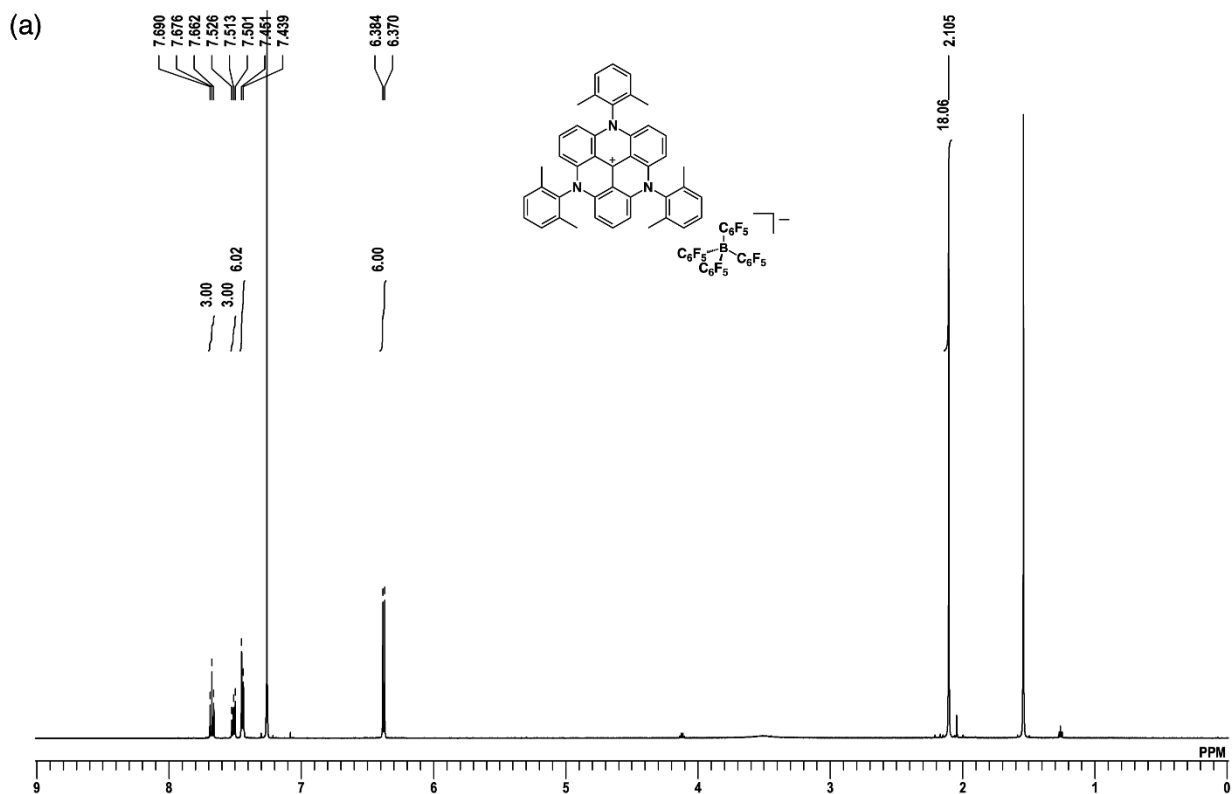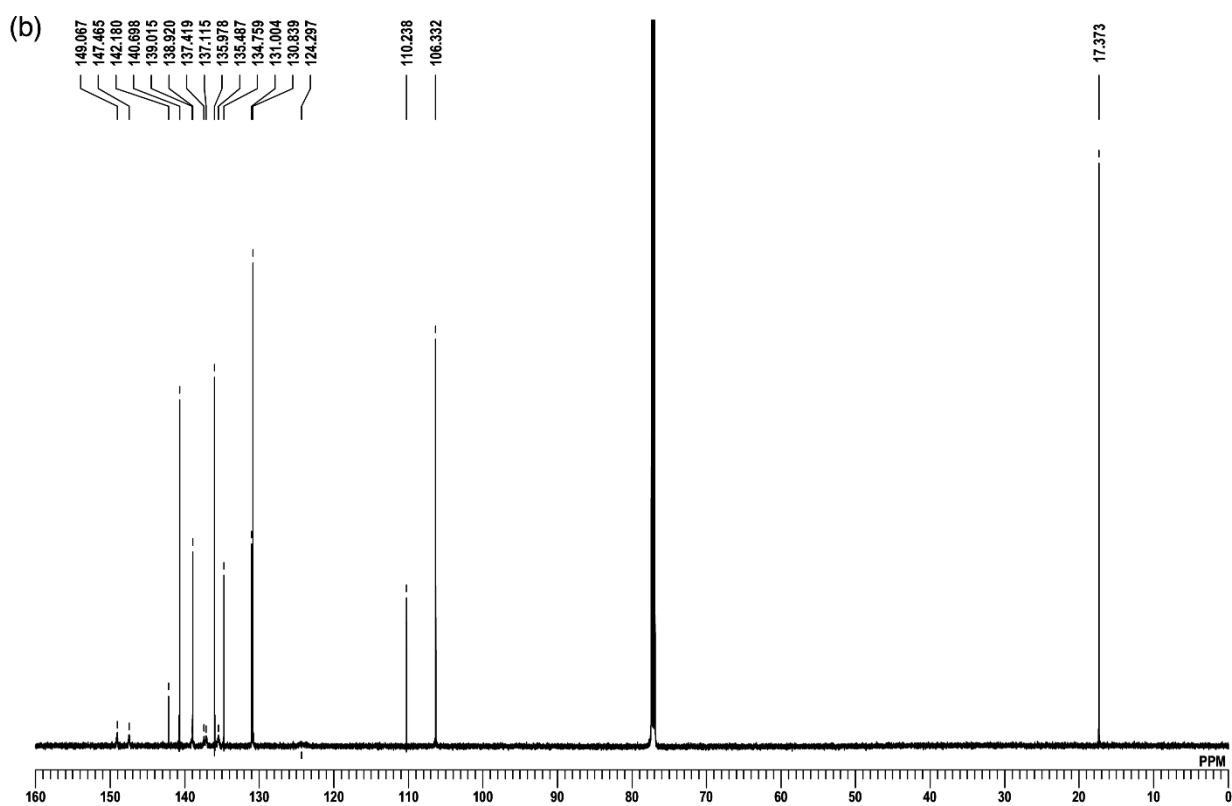

(c)

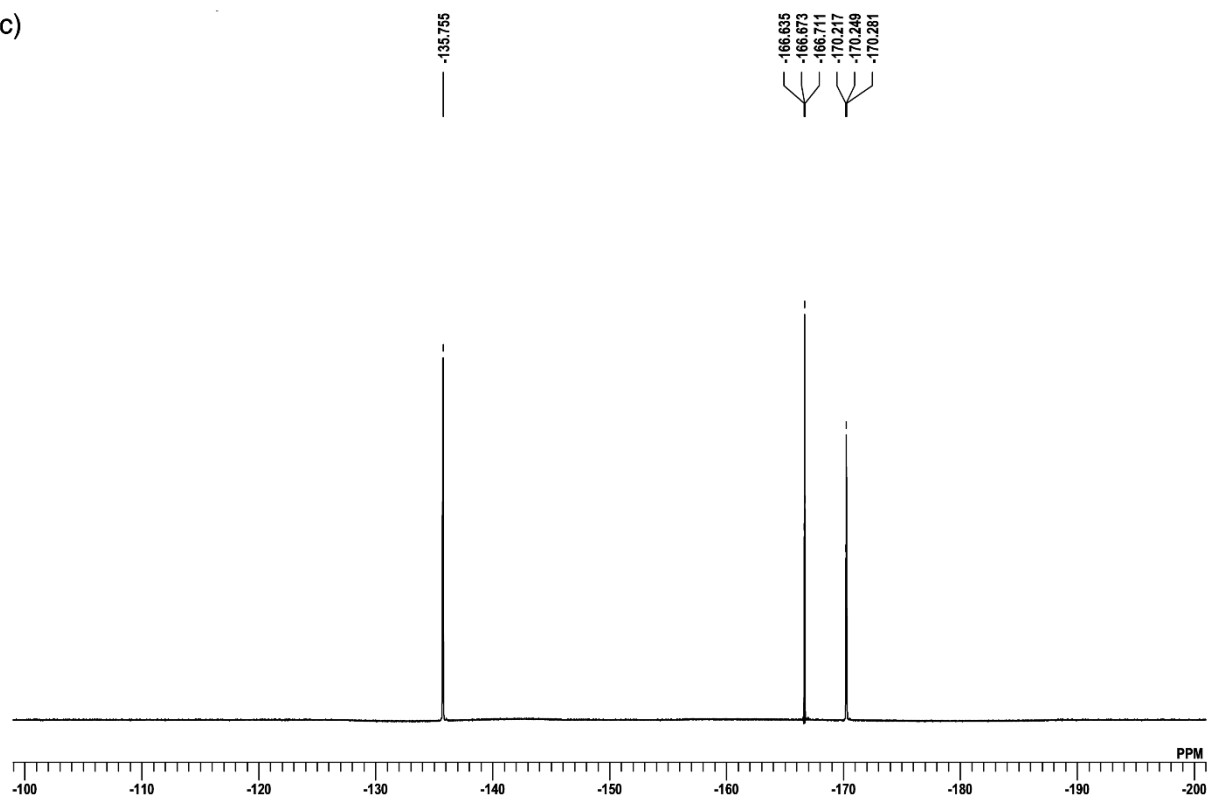



Figure S4 (a)  $^1\text{H}$  NMR and (b)  $^{13}\text{C}$  NMR spectra of  $2^+$ -PCCp $^-$  in  $\text{CDCl}_3$ .

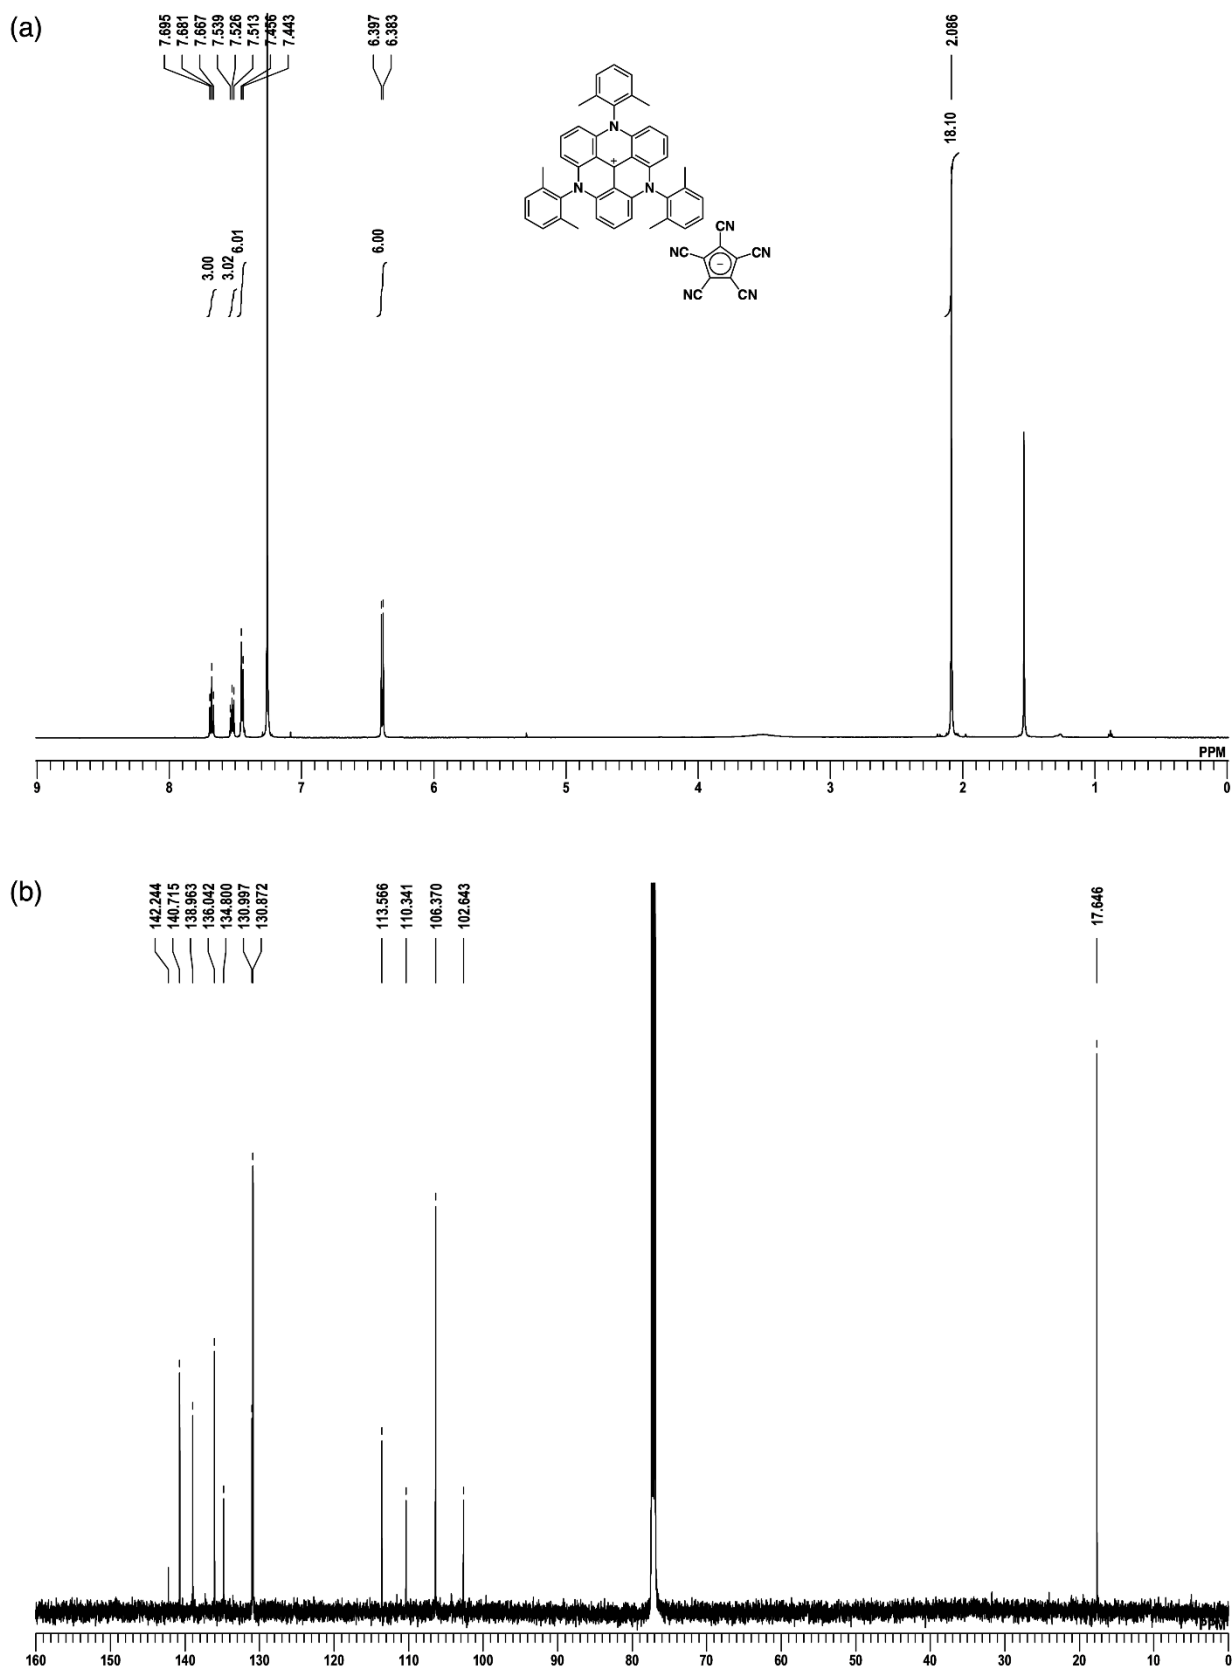

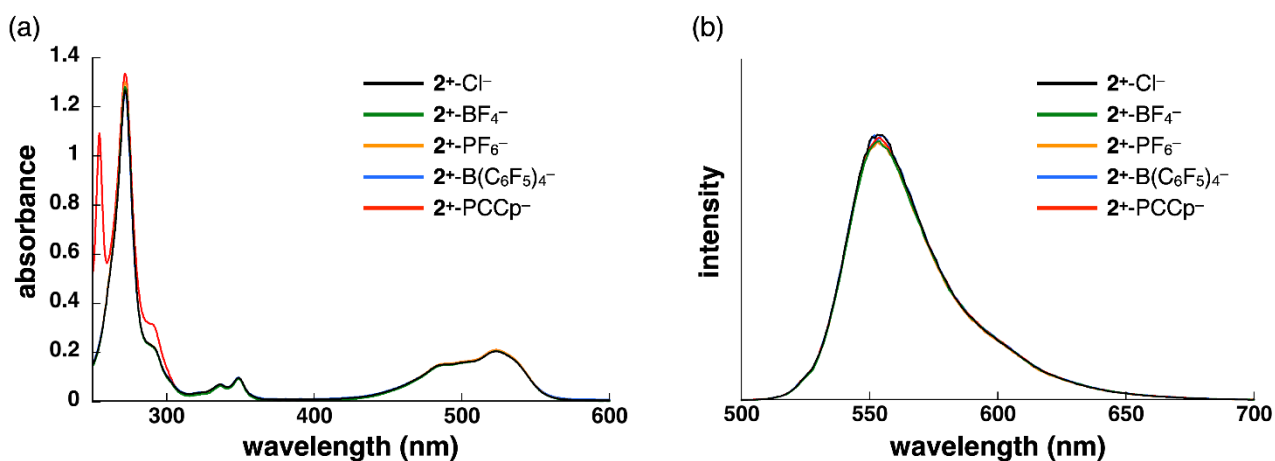

**Figure S5** (a) UV-vis absorption and (b) fluorescence spectra of  $2^+-X^-$  ( $X^- = Cl^-$ ,<sup>[S1]</sup>  $BF_4^-$ ,  $PF_6^-$ ,  $B(C_6F_5)_4^-$ ,  $PCCp^-$ ) in  $CH_3CN$  ( $1 \times 10^{-5}$  M) upon excitation at 524 nm for (b).

[S1] Li, D.; Silveira, O. J.; Matsuda, T.; Hayashi, H.; Maeda, H.; Foster, A. S.; Kawai, S. *Angew. Chem. Int. Ed.* **2024**, *63*, e202411893.

## 2. X-ray crystallographic data

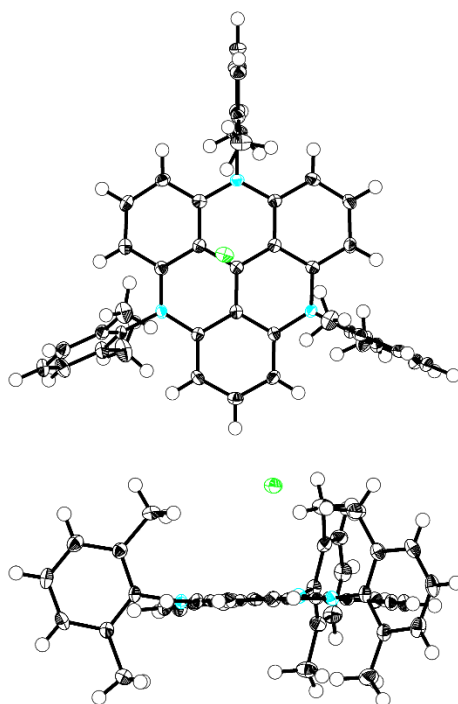

**Figure S6** Ortep drawing of single-crystal X-ray structure (top and side views) of 2<sup>+</sup>-Cl<sup>-</sup>. Thermal ellipsoids are scaled to the 50% probability level. Solvent molecules are omitted for clarity. Atom code: black, white (sphere), blue, and green refer to carbon, hydrogen, nitrogen, and chlorine, respectively.

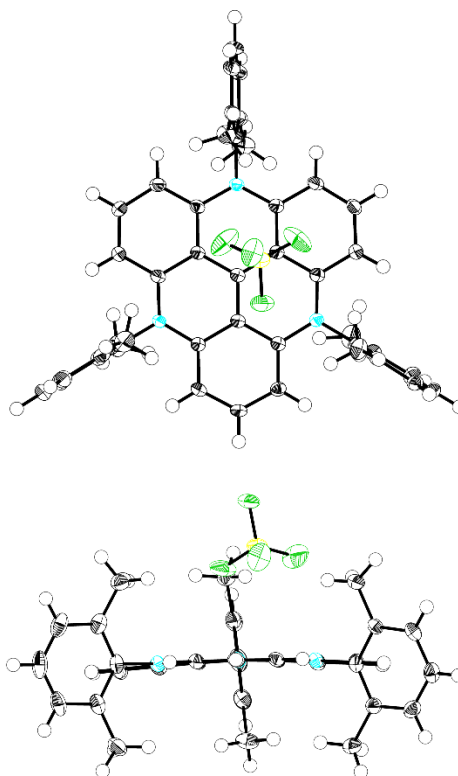

**Figure S7** Ortep drawing of single-crystal X-ray structure (top and side views) of 2<sup>+</sup>-BF<sub>4</sub><sup>-</sup>. Thermal ellipsoids are scaled to the 50% probability level. Solvent molecules are omitted for clarity. Atom code: black, white (sphere), yellow, blue, and green refer to carbon, hydrogen, boron, nitrogen, and fluorine, respectively.

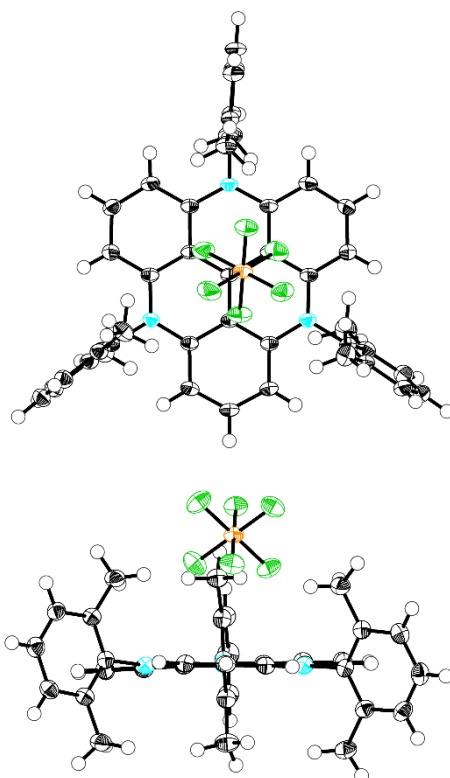

**Figure S8** Ortep drawing of single-crystal X-ray structure (top and side views) of  $2^+ \text{-PF}_6^-$ . Thermal ellipsoids are scaled to the 50% probability level. Atom code: black, white (sphere), blue, green, and tangerine refer to carbon, hydrogen, nitrogen, fluorine, and phosphorus, respectively.

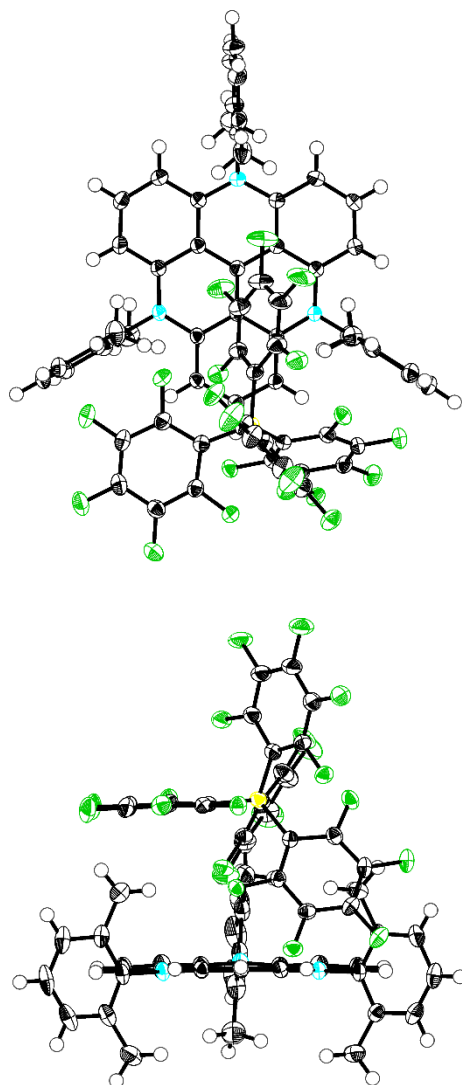

**Figure S9** Ortep drawing of single-crystal X-ray structure (top and side views) of  $2^+-(C_6F_5)_4^-$ . Thermal ellipsoids are scaled to the 50% probability level. Solvent molecules are omitted for clarity. Atom code: black, white (sphere), yellow, blue, and green refer to carbon, hydrogen, boron, nitrogen, and fluorine, respectively.

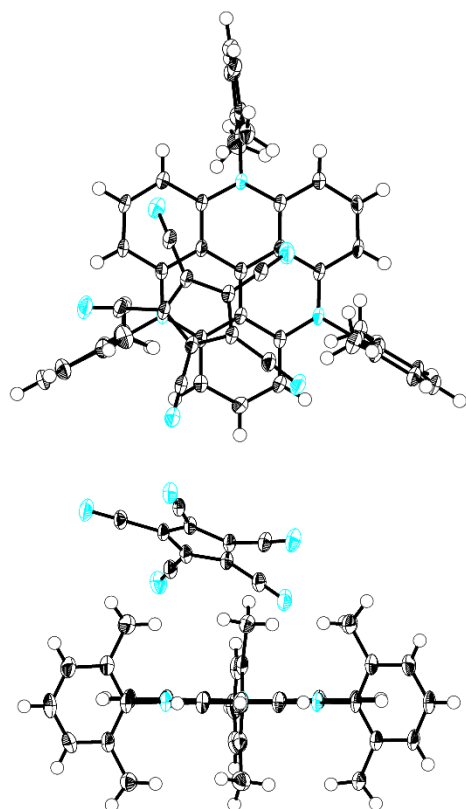

**Figure S10** Ortep drawing of single-crystal X-ray structure (top and side views) of  $2^+$ -PCCp $^-$ . Thermal ellipsoids are scaled to the 50% probability level. Solvent molecules are omitted for clarity. Atom code: black, white (sphere), and blue refer to carbon, hydrogen, and nitrogen, respectively.

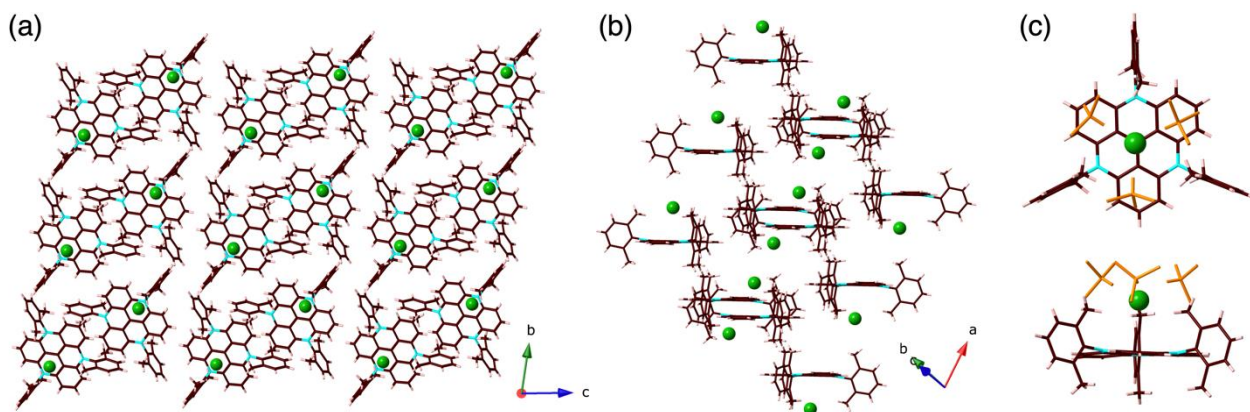

**Figure S11** Single-crystal X-ray structure of  $2^+-\text{Cl}^-$ : (a) top and (b) side views of the packing structure, and (c) monomers. Solvent molecules are omitted for clarity in (a) and (b). In (c),  $\text{Cl}^-$  formed hydrogen bonding with surrounding three  $\text{CHCl}_3$  molecules (indicated as orange color). The dihedral angles between the  $\text{TATA}^+$  plane and N-aryl groups were  $81.0^\circ$ ,  $87.3^\circ$ , and  $89.9^\circ$ . Atom color code: brown, pink, blue, and green refer to carbon, hydrogen, nitrogen, and chlorine, respectively.

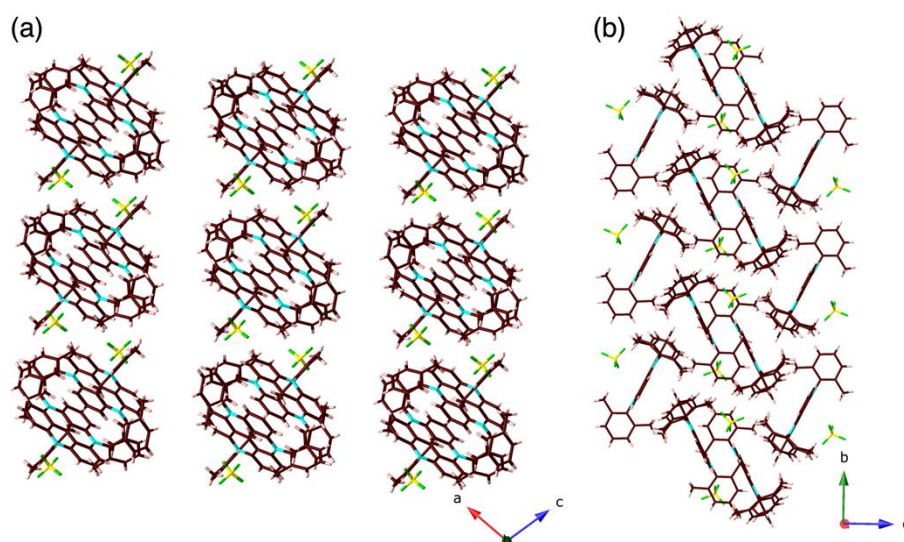

**Figure S12** Single-crystal X-ray structure of  $2^+-\text{BF}_4^-$ : (a) top and (b) side views. Solvent molecules are omitted for clarity. The dihedral angle between the  $\text{TATA}^+$  planes was  $53.7^\circ$ . Atom color code: brown, pink, yellow, blue, and green refer to carbon, hydrogen, boron, nitrogen, and fluorine, respectively.

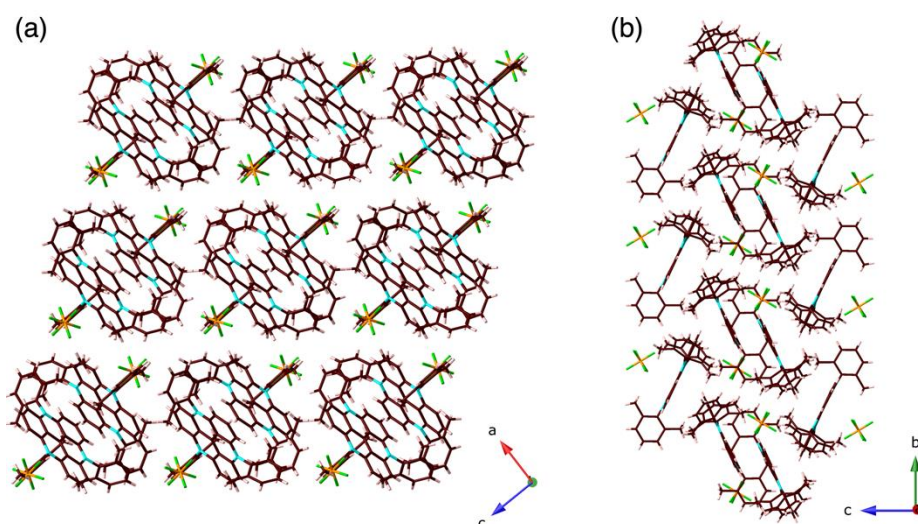

**Figure S13** Single-crystal X-ray structure of  $2^+-\text{PF}_6^-$ : (a) top and (b) side views. The dihedral angle between the  $\text{TATA}^+$  planes was  $51.4^\circ$ . Atom color code: brown, pink, blue, green, and orange refer to carbon, hydrogen, nitrogen, fluorine, and phosphorus, respectively.

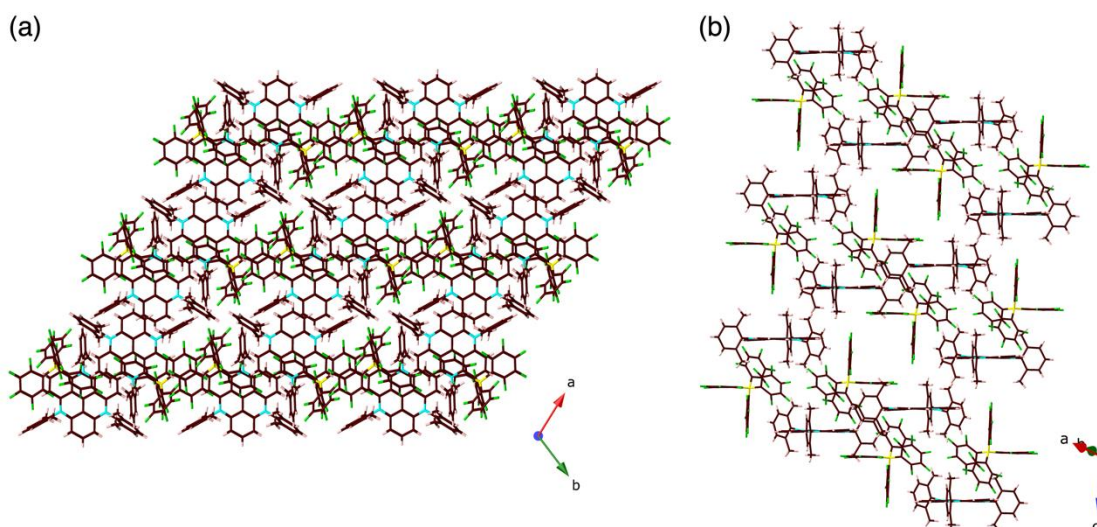

**Figure S14** Single-crystal X-ray structure of  $2^+ \cdot B(C_6F_5)_4^-$ : (a) top and (b) side views. Solvent molecules are omitted for clarity. Atom color code: brown, pink, yellow, blue, and green refer to carbon, hydrogen, boron, nitrogen, and fluorine, respectively.

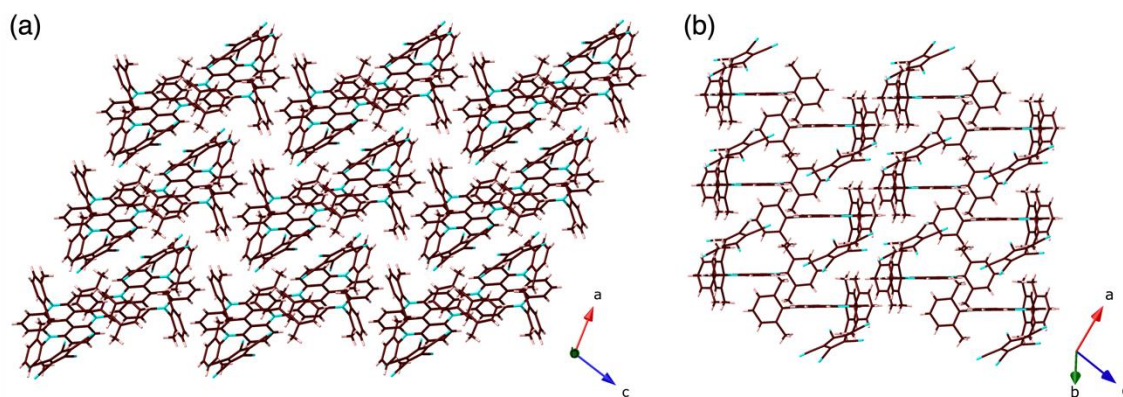

**Figure S15** Single-crystal X-ray structure of  $2^+ \cdot PCCp^-$ : (a) top and (b) side views. Solvent molecules are omitted for clarity. The distance between the TATA<sup>+</sup> planes on the same column was 8.93 Å. Atom color code: brown, pink, and blue refer to carbon, hydrogen, and nitrogen, respectively.



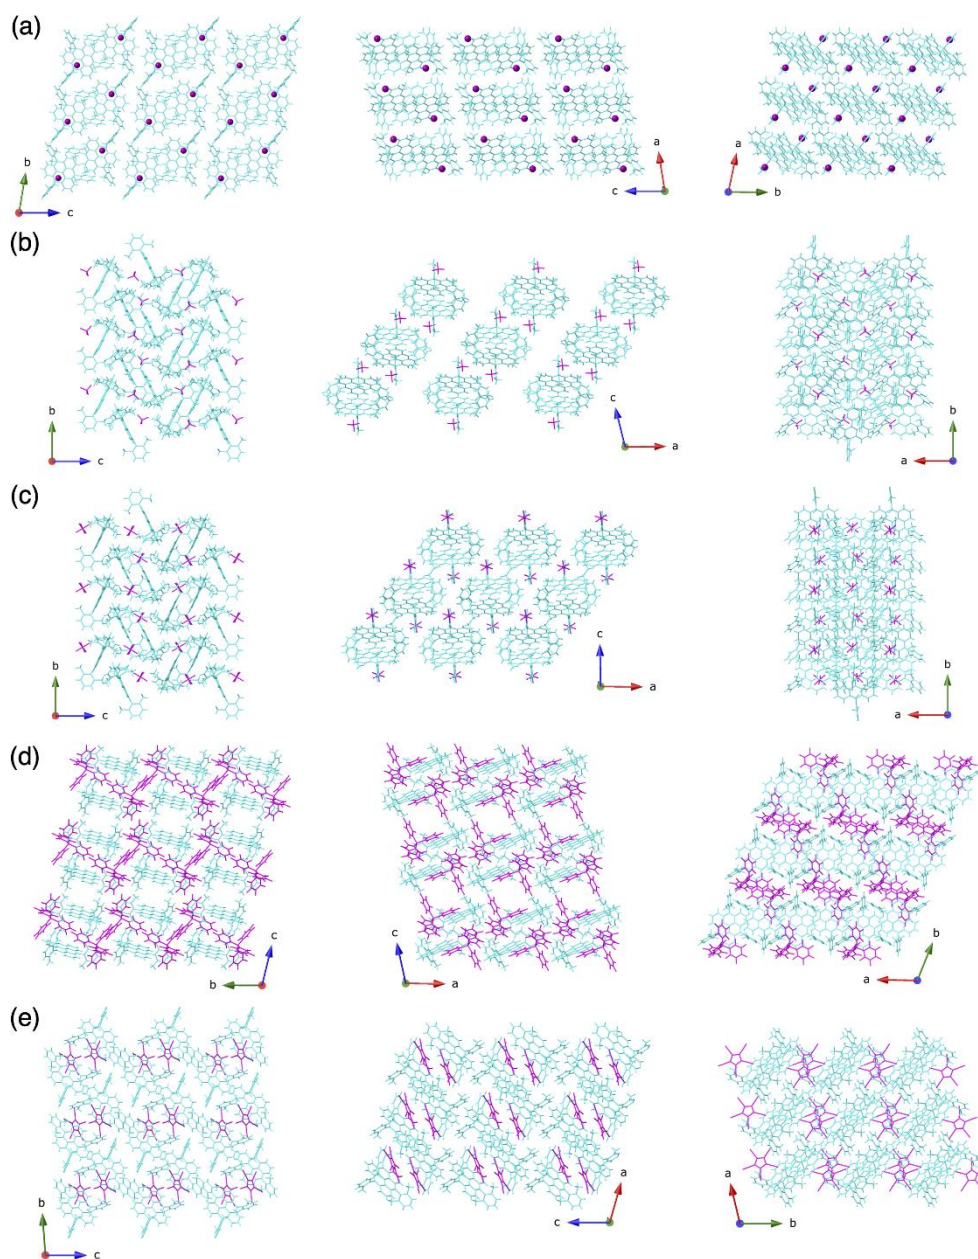

**Figure S16** Packing diagrams through *a*, *b*, and *c* axes of (a)  $2^+-\text{Cl}^-$ , (b)  $2^+-\text{BF}_4^-$ , (c)  $2^+-\text{PF}_6^-$ , (d)  $2^+-\text{B}(\text{C}_6\text{F}_5)_4^-$ , and (e)  $2^+-\text{PCCp}^-$ , wherein cyan and magenta represent cation and anion parts, respectively.

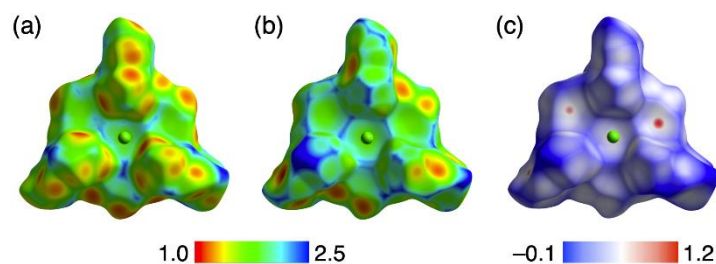

**Figure S17** Hirshfeld surfaces<sup>[S2]</sup> of  $2^+-\text{Cl}^-$  in the crystal structure mapped with (a)  $d_i$ , (b)  $d_e$ , and (c)  $d_{\text{norm}}$ .  $d_i$  is a distance from the Hirshfeld surface to the nearest atom inside the surface,  $d_e$  is a distance from the Hirshfeld surface to the nearest atom outside the surface, and  $d_{\text{norm}}$  is a normalized contact distance. Atom color code: green refers to chlorine.

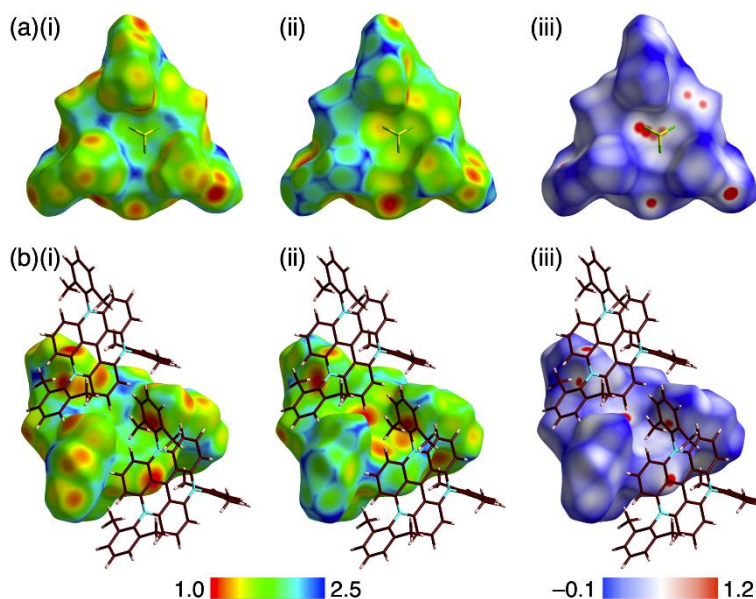

**Figure S18** Hirshfeld surfaces<sup>[S2]</sup> of  $2^+-\text{BF}_4^-$  in the crystal structure as (a) ion pair and (b) cations mapped with (i)  $d_i$ , (ii)  $d_e$ , and (iii)  $d_{\text{norm}}$ .  $d_i$  is a distance from the Hirshfeld surface to the nearest atom inside the surface,  $d_e$  is a distance from the Hirshfeld surface to the nearest atom outside the surface, and  $d_{\text{norm}}$  is a normalized contact distance. Atom color code: brown, pink, yellow, blue, and green refer to carbon, hydrogen, boron, nitrogen, and fluorine, respectively.

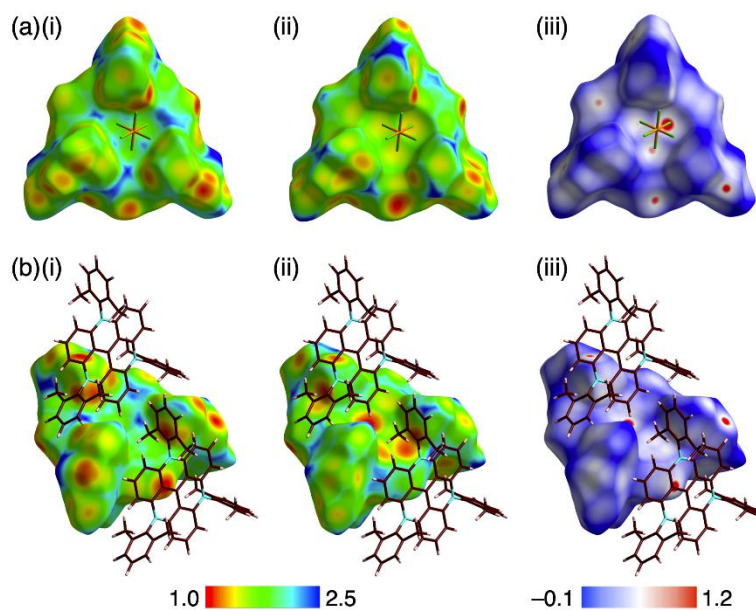

**Figure S19** Hirshfeld surfaces<sup>[S2]</sup> of  $2^+-\text{PF}_6^-$  in the crystal structure as (a) ion pair and (b) cations mapped with (i)  $d_i$ , (ii)  $d_e$ , and (iii)  $d_{\text{norm}}$ .  $d_i$  is a distance from the Hirshfeld surface to the nearest atom inside the surface,  $d_e$  is a distance from the Hirshfeld surface to the nearest atom outside the surface, and  $d_{\text{norm}}$  is a normalized contact distance. Atom color code: brown, pink, blue, green, and orange refer to carbon, hydrogen, nitrogen, fluorine, and phosphorus, respectively.

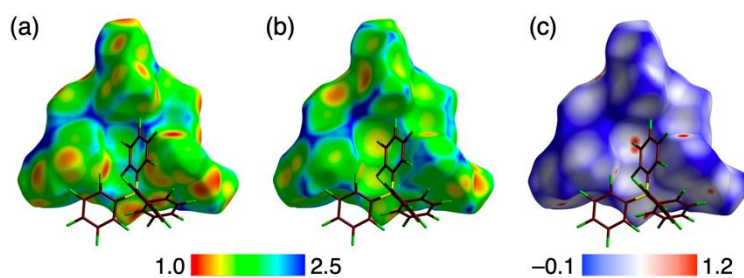

**Figure S20** Hirshfeld surfaces<sup>[S2]</sup> of  $2^+-B(C_6F_5)_4^-$  in the crystal structure mapped with (a)  $d_i$ , (b)  $d_e$ , and (c)  $d_{norm}$ .  $d_i$  is a distance from the Hirshfeld surface to the nearest atom inside the surface,  $d_e$  is a distance from the Hirshfeld surface to the nearest atom outside the surface, and  $d_{norm}$  is a normalized contact distance. Atom color code: brown, yellow, and green refer to carbon, boron, and fluorine, respectively.

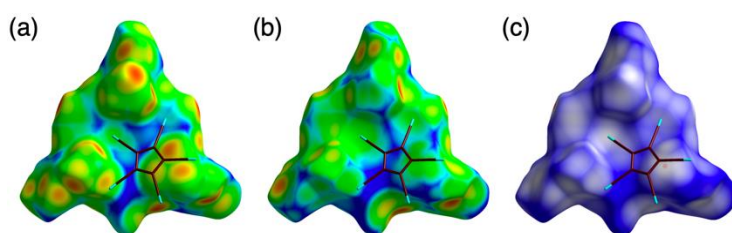

**Figure S21** Hirshfeld surfaces<sup>[S2]</sup> of  $2^+-PCCp^-$  in the crystal structure mapped with (a)  $d_i$ , (b)  $d_e$ , and (c)  $d_{norm}$ .  $d_i$  is a distance from the Hirshfeld surface to the nearest atom inside the surface,  $d_e$  is a distance from the Hirshfeld surface to the nearest atom outside the surface, and  $d_{norm}$  is a normalized contact distance. Atom color code: brown and blue refer to carbon and nitrogen, respectively.

[S2] Spackman, P. R.; Turner, M. J.; McKinnon, J. J.; Wolff, S. K.; Grimwood, D. J.; Jayatilaka, D.; Spackman, M. A. *J. Appl. Cryst.* **2021**, *54*, 1006–1011.

### 3. Theoretical studies

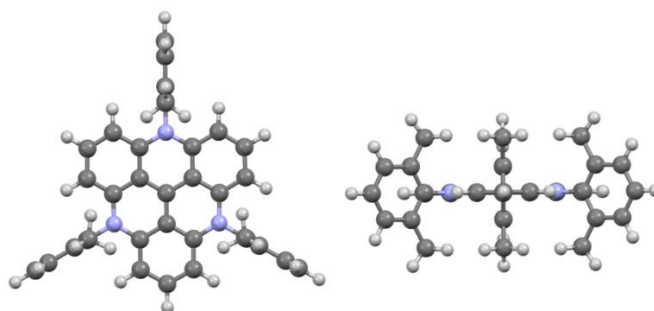

**Figure S22** Optimized structure (top and side views) of  $2^+$  at B3LYP/6-31+G(d,p).

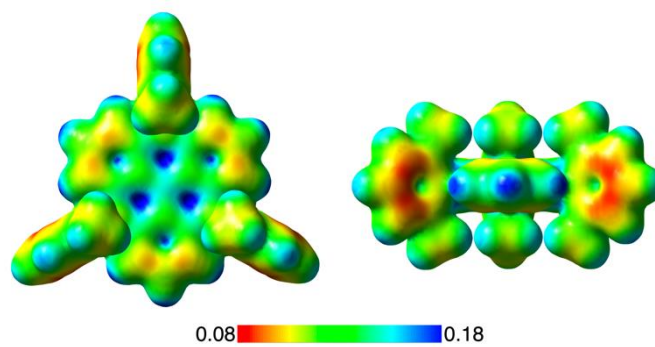

**Figure S23** Electrostatic potentials (ESP) mapped onto the electron density isosurfaces ( $\delta = 0.01$ ) for top and side views of  $2^+$  at B3LYP/6-31+G(d,p).

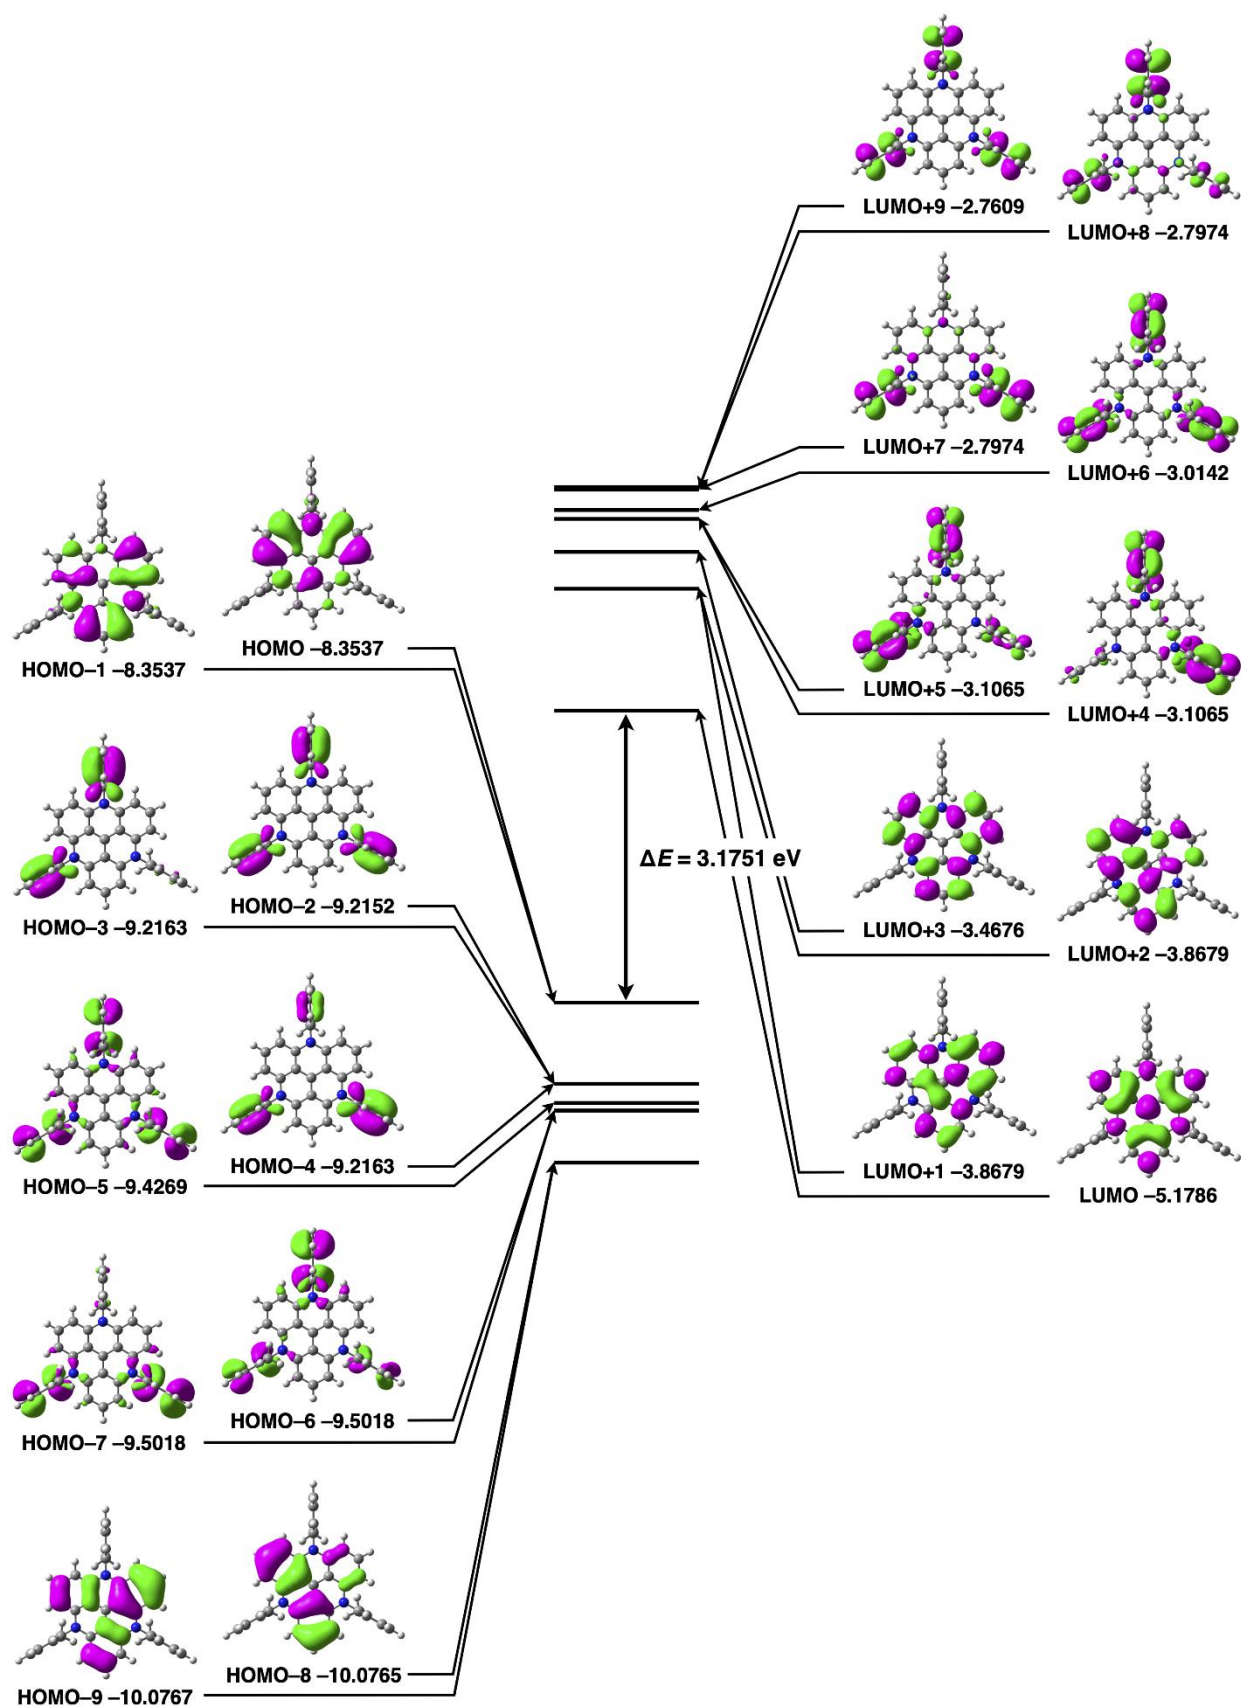

Figure S24 Molecular orbitals (HOMO/LUMO) of  $2^+$  estimated at B3LYP/6-31G(d,p).

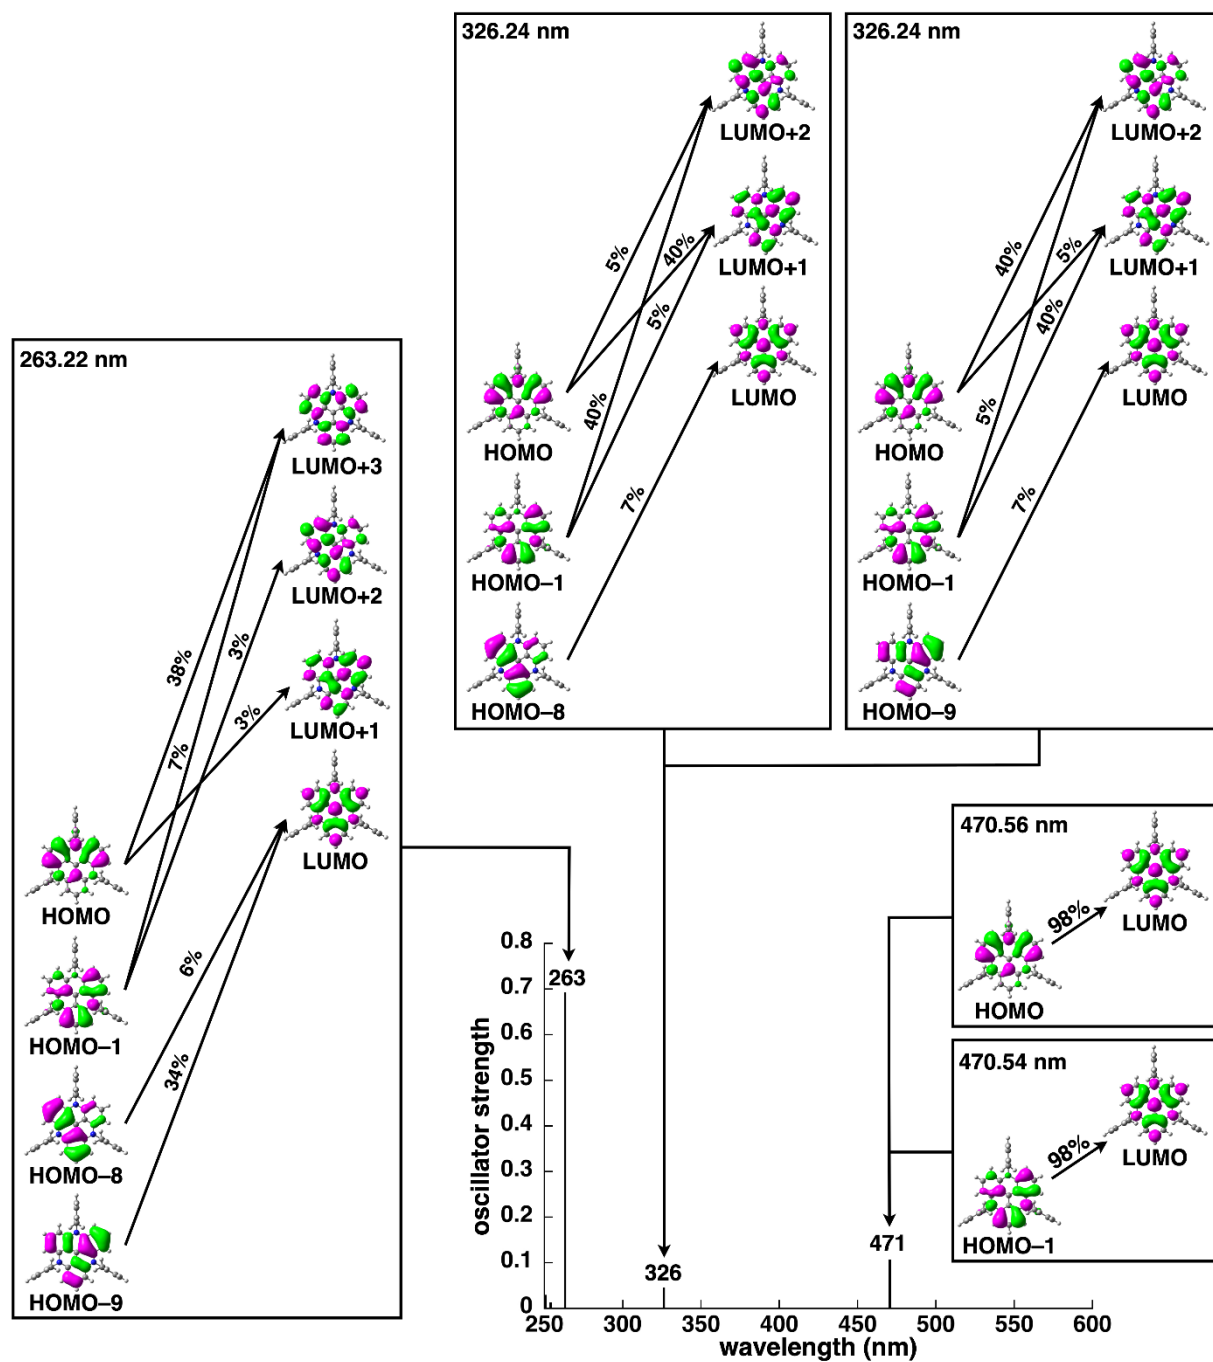

Figure S25 TD-DFT-based UV-vis absorption stick spectrum of  $2^+$  estimated at B3LYP/6-31G(d,p).

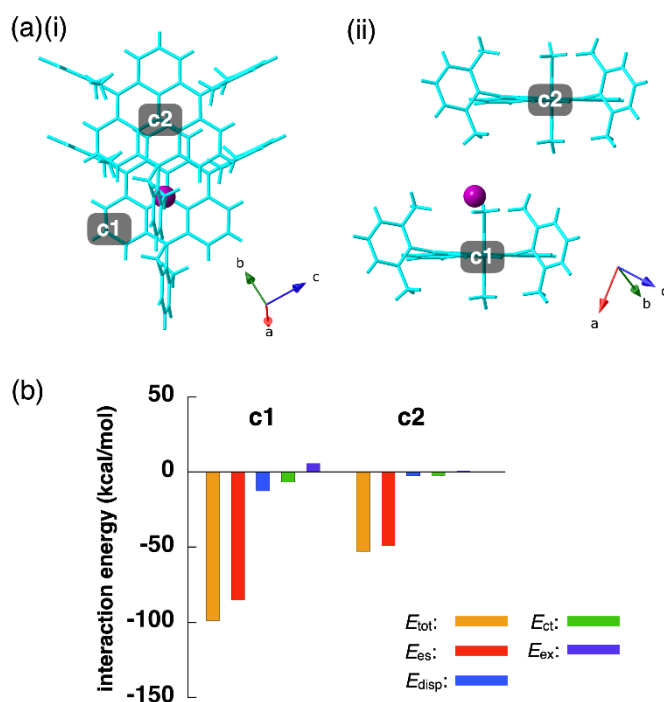

**Figure S26** Single-crystal X-ray structure of  $2^+-Cl^-$  for the EDA calculations (Table S1): (a) packing structures ((i) top and (ii) side views) and (b) intermolecular interaction energies (kcal/mol) between  $Cl^-$  and selected  $2^+$  estimated at the FMO2-MP2 method using NOSeC-V-DZP with MCP.<sup>[S3-5]</sup>

**Table S1** Energies between selected fragments in  $2^+-Cl^-$  (Figure S26) estimated by EDA calculations based on an FMO2-MP2 using the basis set of NOSeC-V-DZP with MCP.<sup>[S3-5]</sup>

| fragments | total interaction energy ( $E_{tot}$ ) (kcal/mol) | electrostatic interaction energy ( $E_{es}$ ) (kcal/mol) | dispersion interaction energy ( $E_{disp}$ ) (kcal/mol) | charge-transfer interaction energy ( $E_{ct+mix}$ ) (kcal/mol) | exchange repulsion interaction energy ( $E_{ex}$ ) (kcal/mol) |
|-----------|---------------------------------------------------|----------------------------------------------------------|---------------------------------------------------------|----------------------------------------------------------------|---------------------------------------------------------------|
| Cl-c1     | -98.717                                           | -85.178                                                  | -12.516                                                 | -6.653                                                         | 5.540                                                         |
| Cl-c2     | -52.788                                           | -49.000                                                  | -2.3600                                                 | -2.259                                                         | 0.832                                                         |

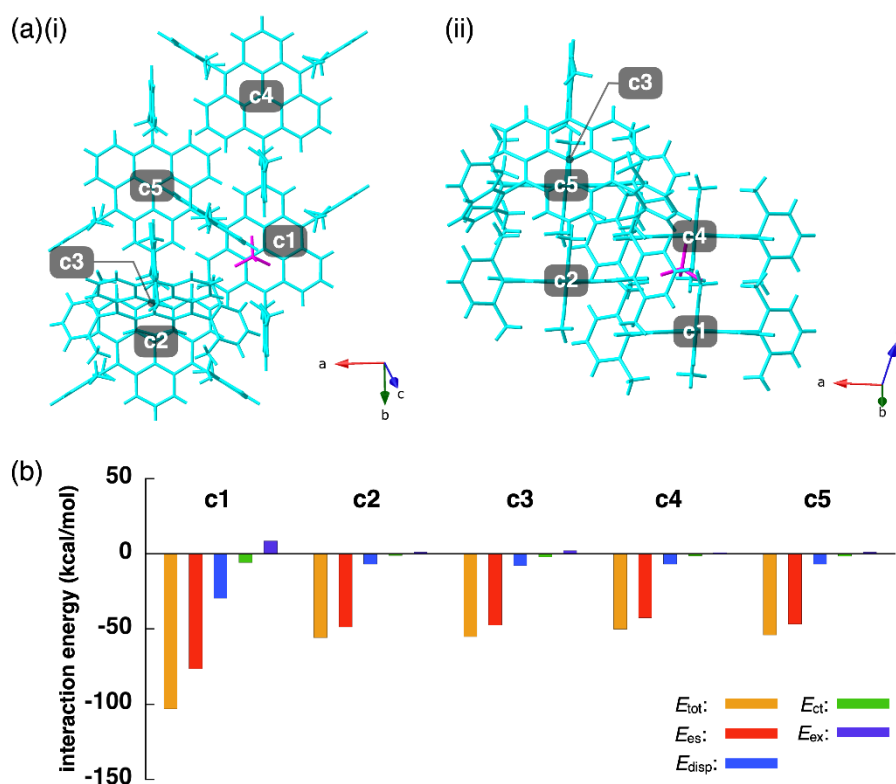

**Figure S27** Single-crystal X-ray structure of  $2^+-BF_4^-$  for the EDA calculations (Table S2): (a) packing structures ((i) top and (ii) side views) and (b) intermolecular interaction energies (kcal/mol) between  $BF_4^-$  and selected  $2^+$  estimated at the FMO2-MP2 method using NOSec-V-DZP with MCP.<sup>[S3-5]</sup>

**Table S2** Energies between selected fragments in  $2^+-BF_4^-$  (Figure S27) estimated by EDA calculations based on an FMO2-MP2 using the basis set of NOSec-V-DZP with MCP.<sup>[S3-5]</sup>

| fragments    | total interaction energy ( $E_{tot}$ ) (kcal/mol) | electrostatic interaction energy ( $E_{es}$ ) (kcal/mol) | dispersion interaction energy ( $E_{disp}$ ) (kcal/mol) | charge-transfer interaction energy ( $E_{ct+mix}$ ) (kcal/mol) | exchange repulsion interaction energy ( $E_{ex}$ ) (kcal/mol) |
|--------------|---------------------------------------------------|----------------------------------------------------------|---------------------------------------------------------|----------------------------------------------------------------|---------------------------------------------------------------|
| $BF_4^-$ -c1 | -102.928                                          | -76.282                                                  | -29.476                                                 | -5.649                                                         | 8.480                                                         |
| $BF_4^-$ -c2 | -55.712                                           | -48.578                                                  | -6.877                                                  | -1.193                                                         | 0.935                                                         |
| $BF_4^-$ -c3 | -53.964                                           | -46.713                                                  | -6.808                                                  | -1.480                                                         | 1.041                                                         |
| $BF_4^-$ -c4 | -49.887                                           | -42.543                                                  | -6.886                                                  | -1.276                                                         | 0.818                                                         |
| $BF_4^-$ -c5 | -54.956                                           | -47.349                                                  | -7.743                                                  | -2.209                                                         | 2.165                                                         |



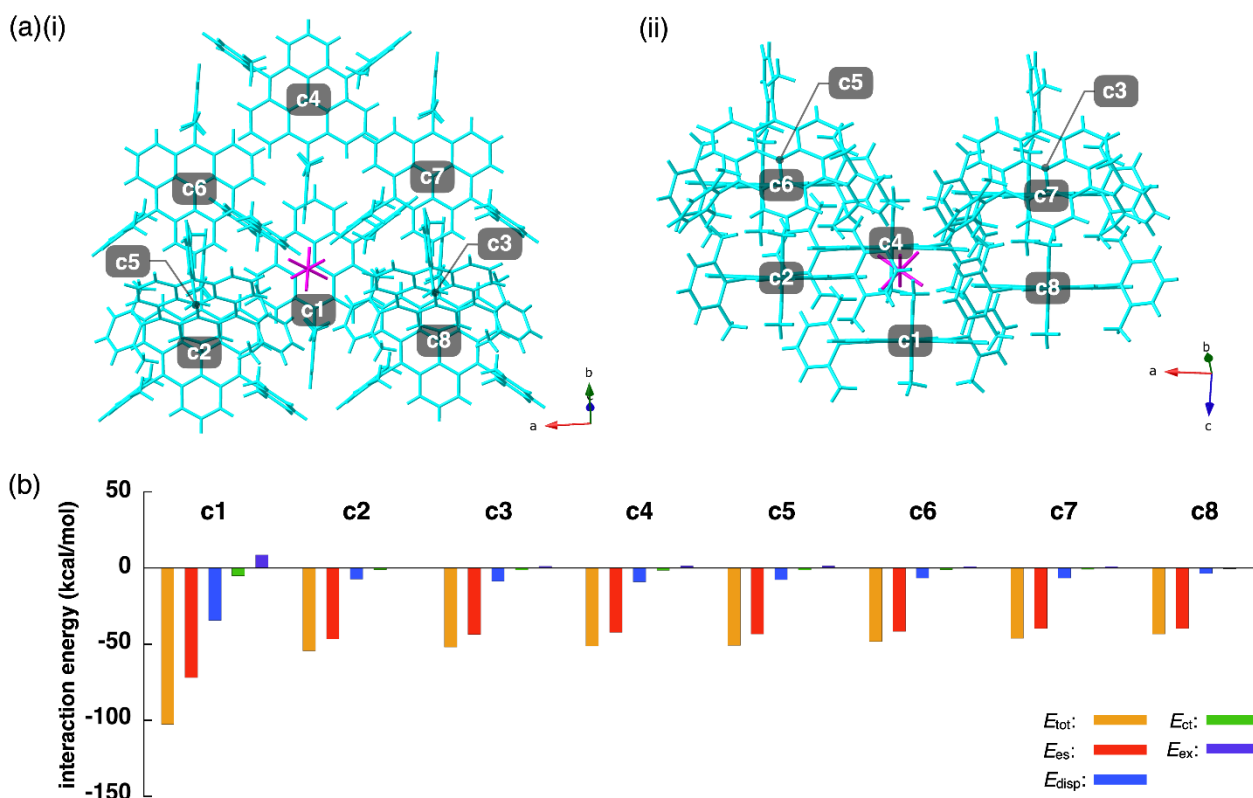

**Figure S28** Single-crystal X-ray structure of  $2^+ \text{-PF}_6^-$  for the EDA calculations (Table S3): (a) packing structures ((i) top and (ii) side views) and (b) intermolecular interaction energies (kcal/mol) between  $\text{PF}_6^-$  and selected  $2^+$  estimated at the FMO2-MP2 method using NOSec-V-DZP with MCP.<sup>[S3-5]</sup>

**Table S3** Energies between selected fragments in  $2^+ \text{-PF}_6^-$  (Figure S28) estimated by EDA calculations based on an FMO2-MP2 using the basis set of NOSec-V-DZP with MCP.<sup>[S3-5]</sup>

| fragments                  | total interaction energy ( $E_{\text{tot}}$ ) (kcal/mol) | electrostatic interaction energy ( $E_{\text{es}}$ ) (kcal/mol) | dispersion interaction energy ( $E_{\text{disp}}$ ) (kcal/mol) | charge-transfer interaction energy ( $E_{\text{ct} + \text{mix}}$ ) (kcal/mol) | exchange repulsion interaction energy ( $E_{\text{ex}}$ ) (kcal/mol) |
|----------------------------|----------------------------------------------------------|-----------------------------------------------------------------|----------------------------------------------------------------|--------------------------------------------------------------------------------|----------------------------------------------------------------------|
| $\text{PF}_6^- \text{-c1}$ | -102.489                                                 | -71.920                                                         | -34.234                                                        | -5.012                                                                         | 8.677                                                                |
| $\text{PF}_6^- \text{-c2}$ | -54.268                                                  | -46.632                                                         | -7.228                                                         | -0.955                                                                         | 0.547                                                                |
| $\text{PF}_6^- \text{-c3}$ | -51.968                                                  | -43.416                                                         | -8.455                                                         | -1.285                                                                         | 1.187                                                                |
| $\text{PF}_6^- \text{-c4}$ | -51.127                                                  | -42.181                                                         | -8.916                                                         | -1.402                                                                         | 1.372                                                                |
| $\text{PF}_6^- \text{-c5}$ | -50.816                                                  | -43.287                                                         | -7.578                                                         | -1.292                                                                         | 1.341                                                                |
| $\text{PF}_6^- \text{-c6}$ | -48.140                                                  | -41.555                                                         | -6.562                                                         | -1.018                                                                         | 0.995                                                                |
| $\text{PF}_6^- \text{-c7}$ | -46.091                                                  | -39.493                                                         | -6.551                                                         | -0.901                                                                         | 0.853                                                                |
| $\text{PF}_6^- \text{-c8}$ | -43.390                                                  | -39.541                                                         | -3.505                                                         | -0.404                                                                         | 0.060                                                                |

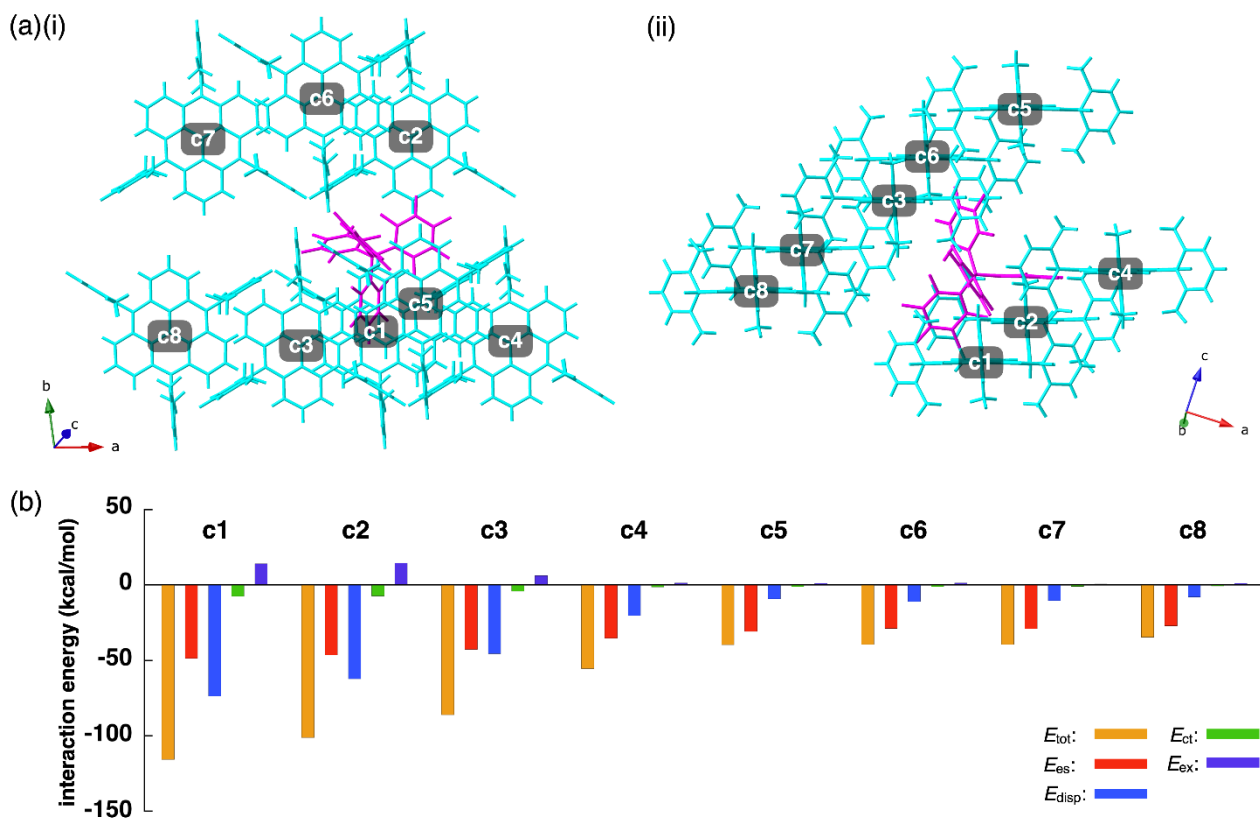

**Figure S29** Single-crystal X-ray structure of  $2^+-B(C_6F_5)_4^-$  for the EDA calculations (Table S4): (a) packing structures ((i) top and (ii) side views) and (b) intermolecular interaction energies (kcal/mol) between  $B(C_6F_5)_4^-$  and selected  $2^+$  estimated at the FMO2-MP2 method using NOSeC-V-DZP with MCP.<sup>[S3-5]</sup>

**Table S4** Energies between selected fragments in  $2^+-B(C_6F_5)_4^-$  (Figure S29) estimated by EDA calculations based on an FMO2-MP2 using basis set of NOSeC-V-DZP with MCP.<sup>[S3-5]</sup>

| fragments           | total interaction energy ( $E_{tot}$ ) (kcal/mol) | electrostatic interaction energy ( $E_{es}$ ) (kcal/mol) | dispersion interaction energy ( $E_{disp}$ ) (kcal/mol) | charge-transfer interaction energy ( $E_{ct+mix}$ ) (kcal/mol) | exchange repulsion interaction energy ( $E_{ex}$ ) (kcal/mol) |
|---------------------|---------------------------------------------------|----------------------------------------------------------|---------------------------------------------------------|----------------------------------------------------------------|---------------------------------------------------------------|
| $B(C_6F_5)_4^-$ -c1 | -115.698                                          | -48.551                                                  | -73.682                                                 | -7.517                                                         | 14.052                                                        |
| $B(C_6F_5)_4^-$ -c2 | -101.241                                          | -46.392                                                  | -62.150                                                 | -7.259                                                         | 14.560                                                        |
| $B(C_6F_5)_4^-$ -c3 | -86.012                                           | -42.719                                                  | -45.520                                                 | -4.067                                                         | 6.935                                                         |
| $B(C_6F_5)_4^-$ -c4 | -55.396                                           | -35.217                                                  | -20.276                                                 | -1.282                                                         | 1.379                                                         |
| $B(C_6F_5)_4^-$ -c5 | -39.621                                           | -30.683                                                  | -9.194                                                  | -0.945                                                         | 1.210                                                         |
| $B(C_6F_5)_4^-$ -c6 | -39.425                                           | -28.828                                                  | -10.850                                                 | -1.103                                                         | 1.357                                                         |
| $B(C_6F_5)_4^-$ -c7 | -39.302                                           | -28.890                                                  | -10.229                                                 | -0.835                                                         | 0.652                                                         |
| $B(C_6F_5)_4^-$ -c8 | -34.495                                           | -27.114                                                  | -7.905                                                  | -0.676                                                         | 1.199                                                         |

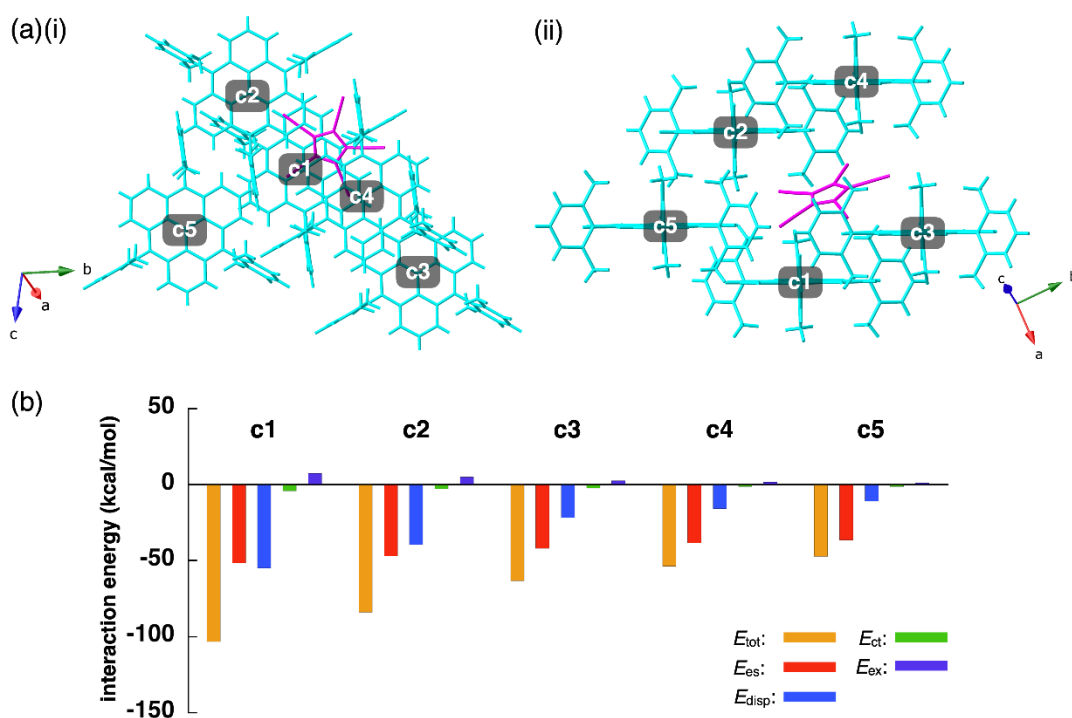

**Figure S30** Single-crystal X-ray structure of  $2^+$ -PCCp $^-$  for the EDA calculations (Table S5): (a) packing structures ((i) top and (ii) side views) and (b) intermolecular interaction energies (kcal/mol) between PCCp $^-$  and selected  $2^+$  estimated at the FMO2-MP2 method using NOSeC-V-DZP with MCP.<sup>[S3-5]</sup>

**Table S5** Energies between selected fragments in  $2^+$ -PCCp $^-$  (Figure S30) estimated by EDA calculations based on an FMO2-MP2 using the basis set of NOSeC-V-DZP with MCP.<sup>[S3-5]</sup>

| fragments     | total interaction energy ( $E_{tot}$ ) (kcal/mol) | electrostatic interaction energy ( $E_{es}$ ) (kcal/mol) | dispersion interaction energy ( $E_{disp}$ ) (kcal/mol) | charge-transfer interaction energy ( $E_{ct+mix}$ ) (kcal/mol) | exchange repulsion interaction energy ( $E_{ex}$ ) (kcal/mol) |
|---------------|---------------------------------------------------|----------------------------------------------------------|---------------------------------------------------------|----------------------------------------------------------------|---------------------------------------------------------------|
| PCCp $^-$ -c1 | -103.180                                          | -51.513                                                  | -54.901                                                 | -4.109                                                         | 7.344                                                         |
| PCCp $^-$ -c2 | -83.820                                           | -46.847                                                  | -39.318                                                 | -2.683                                                         | 5.028                                                         |
| PCCp $^-$ -c3 | -63.111                                           | -41.779                                                  | -21.707                                                 | -2.214                                                         | 2.589                                                         |
| PCCp $^-$ -c4 | -53.593                                           | -38.366                                                  | -15.768                                                 | -1.126                                                         | 1.667                                                         |
| PCCp $^-$ -c5 | -46.988                                           | -36.286                                                  | -10.655                                                 | -1.137                                                         | 1.090                                                         |

## Cartesian Coordination of 2<sup>+</sup>

-1824.5377133 hartree

C,-0.3280394164,-0.2081893775,0.6435716534  
C,-1.2469212786,0.5787239715,1.3751901435  
C,-2.2069791359,-0.0535496247,2.2220161073  
C,-1.2101006892,2.0016521517,1.2634834181  
C,-3.1115041463,0.737894834,2.941329104  
C,-2.1261063566,2.7694192096,1.9938471736  
C,-3.0523887458,2.1250015044,2.8128618621  
H,-3.8475951236,0.2807882917,3.5890367782  
H,-2.1167740751,3.8489780644,1.9248355989  
H,-3.7580028886,2.729320035,3.3747551758  
C,-0.3613116145,-1.617475456,0.7515256347  
C,-1.3244292482,-2.2422341587,1.6004652429  
C,0.5683632174,-2.4086825025,0.0110668496  
C,-1.3464868964,-3.639345043,1.6982462171  
C,0.5245096705,-3.8038736505,0.1271718046  
C,-0.4266918242,-4.3866340294,0.9636492971  
H,-2.0672787743,-4.1344659162,2.3351284151  
H,1.2190022258,-4.4234033599,-0.424334791  
H,-0.4522459178,-5.4688949193,1.0465580742  
C,0.6241316708,0.4141770056,-0.1960076247  
C,0.6545070561,1.8376829402,-0.3023502105  
C,1.5504165633,-0.3840054494,-0.9332273015  
C,1.6029284464,2.4414509916,-1.1377816219  
C,2.4885234653,0.245367819,-1.7613811967  
C,2.4950148621,1.6370919491,-1.8457830311  
H,1.6445949703,3.518164098,-1.2340412871  
H,3.2000439343,-0.3390356414,-2.3293064961  
H,3.2261988455,2.1150424728,-2.4905685629  
N,-0.2620185643,2.5884996428,0.4293243706  
N,1.4955133755,-1.7698027937,-0.8082897859  
N,-2.2176172842,-1.4432671994,2.3096857137  
C,-1.0085688638,4.6542734005,-0.6757957358  
C,-0.22791574,4.0378983413,0.3182751733  
C,0.5841311454,4.7612795203,1.2097986514  
C,0.6005020176,6.1566113653,1.0835107383  
C,-0.1632329592,6.7965791559,0.107087402  
C,-0.9594573127,6.0518051935,-0.7633100905  
H,1.2185101189,6.7414077,1.758443492  
H,-0.1378590906,7.8788600345,0.0242351259  
H,-1.5519773456,6.5552715656,-1.5215296193  
C,-5.0613070607,-3.3009404025,4.8165461577  
C,-3.8134072174,-2.9432475498,5.3274742521  
C,-2.8533297897,-2.3258171824,4.5149448995  
C,-3.196997323,-2.083328139,3.1730787556  
C,-4.4460155139,-2.4323253216,2.6293260567  
C,-5.3733490406,-3.0475527156,3.4806296632  
H,-5.792707515,-3.7786223239,5.4613034923

H,-3.5758320412,-3.1429953338,6.3682033116  
H,-6.3463129961,-3.3282408241,3.0881842064  
C,2.0811365634,-3.0065579953,-2.8512226256  
C,3.0081474868,-3.7850342534,-3.5567726884  
C,4.2395681987,-4.1192748504,-2.9927325412  
C,4.5679484039,-3.6804998267,-1.709806949  
C,3.6736787979,-2.8998283006,-0.9654892183  
C,2.4406074733,-2.5791487106,-1.560639434  
H,2.7577325959,-4.1294351361,-4.5558405475  
H,4.9453249355,-4.7235087071,-3.5545595466  
H,5.5279520646,-3.9437886696,-1.2756084391  
C,1.411077798,4.0687950647,2.2672072895  
H,2.1331431379,3.373621747,1.8244840163  
H,1.9699583796,4.7992879092,2.8561330784  
H,0.7844117951,3.4924728617,2.9569977367  
C,-1.8709294306,3.8483004924,-1.6182536998  
H,-1.2746910403,3.1442360956,-2.2093801176  
H,-2.6236964388,3.2640222788,-1.0772913698  
H,-2.396505215,4.5058676641,-2.3140817327  
C,-4.7843127183,-2.1582320042,1.1829786772  
H,-5.7956285282,-2.5012845591,0.9541601298  
H,-4.7341018459,-1.0882842258,0.952013838  
H,-4.0954292653,-2.6713060599,0.5026477755  
C,-1.5023157758,-1.9388135055,5.0685560955  
H,-0.6880552396,-2.4436265895,4.5367635714  
H,-1.3259262736,-0.8604607061,4.9867527918  
H,-1.4288057734,-2.2092241039,6.1241490971  
C,4.0295210811,-2.4252450224,0.4236252056  
H,4.0298625771,-1.3314757608,0.4892756391  
H,3.3199839309,-2.7965191199,1.1715462902  
H,5.0246180512,-2.7761864396,0.7054482145  
C,0.7478767558,-2.6451483164,-3.4622011187  
H,-0.0873235719,-3.0248968988,-2.863114689  
H,0.6224021598,-1.5598057218,-3.5454398553  
H,0.6582468648,-3.0687164339,-4.4648768616

[S3] Articles for *GAMESS*: (a) Schmidt, M. W.; Baldrige, K. K.; Boatz, J. A.; Elbert, S. T.; Gordon, M. S.; Jensen, J. H.; Koseki, S.; Matsunaga, N.; Nguyen, K. A.; Su, S.; Windus, T. L.; Dupuis, M.; Montgomery, J. A. *J. Comput. Chem.* **1993**, *14*, 1347–1363. (b) Gordon, M. S.; Schmidt, M. W. In *Theory and Applications of Computational Chemistry: the first forty years*; Dykstra, C. E., Frenking, G., Kim, K. S., Scuseria, G. E. Eds.; Elsevier, 2005, pp. 1167–1189.

[S4] Report for FMO: Kitaura, K.; Ikeo, E.; Asada, T.; Nakano, T.; Uebayasi, M. *Chem. Phys. Lett.* **1999**, *313*, 701–706.

[S5] Report for pair interaction energy decomposition analysis (PIEDA): Fedorov, D. G.; Kitaura, K. *J. Comput. Chem.* **2007**, *28*, 222–237.
